# Supplementary material
Source: PubMed Central journal article supplement (PMC2675743)
Supplement: pp.108.134767_1.pdf [file pp.108.134767_1.pdf]

## Supplemental Material S1, Zhang et al. (2009)

### Cloning of PS small RNA fragments.

PS RNA labeled with [ $\gamma^{32}\text{P}$ ]-ATP (NEN) of a length from 30 to 90 nucleotides were isolated from the gel after denaturing PAGE. The gel was washed twice with RNase-free H<sub>2</sub>O, gel slabs containing the small RNA were subjected to thaw/freeze cycles, and submitted to elution in 1x TE by incubation for 12h at 4°C, the sample was centrifuged 1000g for 2 min, filtered with 0.2  $\mu\text{m}$  filter syringes (VIVAscience AG), and butanol extracted to obtain approx 500 $\mu\text{l}$  aqueous RNA solution. The RNA solution was precipitated by adding 1 vol. isopropanol, 1/10 vol. 3M NaOAc (pH 5.2) and 25 $\mu\text{g}$  linear acrylamide (Ambion), de-phosphorylated with shrimp alkaline phosphatase (NEB), 3'-OH linked (T4 RNA Ligase, 10U/ $\mu\text{l}$ , Fermentas) with 10 pmol 5' phosphorylated and 3' biotinylated DNA linker (5' P-dCdTdGdTdAdGdGdCdAdCdCdAdTdCdAdAdAd-3'biotin), phosphorylated with T4 kinase (Ambion), partially labeled with [ $\gamma^{32}\text{P}$ ]-ATP, and the expected linker-ligated fragments appearing on a denaturing PAGE were isolated from gel slabs described above. After incubation at 90°C for 30 sec. in 1x RNA ligase buffer (Fermentas) and 20% (v/v) DMSO, and transfer on ice for 20 sec., the 5' phosphorylated and 3'OH linked RNA was ligated to 10 pmol 5' biotinylated DNA/RNA adaptor (5'biotin - dAdGdAdTdCdGdTrArArGrGrCrArCrCrTrGrArArA-OH) with 0.5 U/ $\mu\text{l}$  T4 RNA ligase (Fermentas) and 0.5 mM ATP, at 37°C for 1 hour. Next resulting fragments carrying the 5' and 3' linkers were submitted to an RT reaction with 10 pmol linker specific 3' RT primer (5-ATTTGATGGTGCCTACAG-3'OH) using 1 U/ $\mu\text{l}$  AMV-RT (Promega) followed by a PCR reaction (Advantage PCR Kit, Clontech) with 20 pmol 5' linker primer (5'-ATCGTAGGCACCTGAAA-3'OH) and 3' RT primer. The produced cDNA was digested with BanI

(NEB), isolated from a 4% agarose gel (Gel Extraction Kit, QIAGEN), concatamerized using 1 U/ $\mu$ l T4 Ligase (NEB), and resulting ligated fragments (> 300bp) were extracted from a 2% agarose gel, and, after a Taq-polymerase fill-in reaction, cloned into TOPO-TA vector (Invitrogen).

## List of oligonucleotides used in the study.

### PCR primers to detect phloem specific RNAs and to create templates for T7 *in vitro* transcription/translation:

| Name           | Sequence (5' to 3')                                                                     | Template Acc.# / target sequence                                                                                                           |
|----------------|-----------------------------------------------------------------------------------------|--------------------------------------------------------------------------------------------------------------------------------------------|
| FK281<br>FK185 | TAATACGACTCACTATAGATGGAGGAGATCACCCAAC<br>CGGCGGATCCGCGCCGAGCCGGTACAG                    | Zea mays KN1 GB acc.# AY312169 forward primer<br>Zea mays KN1 GB acc.# AY312169 reverse primer                                             |
| FK334<br>FK335 | TAATACGACTCACTATAGACAAATTAAGAAGCAGAAACAA<br>AAAGTATAAATATAACACTTCATTTTCATG              | Arabidopsis FT TAIR acc. # AT1G65480 forward primer<br>Arabidopsis FT TAIR acc. # AT1G65480 reverse                                        |
| FK284<br>FK228 | TAATACGACTCACTATAGATGTATGAGCAGCAGCAAC<br>ATAATATGTAAAGGCTAGTGATG                        | AtMPB2C TAIR acc. # At5G08120 forward primer<br>AtMPB2C TAIR acc. # At5G08120 reverse primer                                               |
| FK323<br>FK322 | TAATACGACTCACTATAGATCCTTGCGCTTGGGGCAATG<br>CCGCTCGAGTATGCATGATGCATCATTTAGACTAGTTATTGTAG | AtU4.2/CmU4.2 snRNA TAIR acc. # AT3G06900 forward primer<br>AtU4.2/CmU4.2 snRNA TAIR acc. # AT3G06900 reverse primer                       |
| FK406<br>FK408 | TAATACGACTCACTATAGATCAGAGTGGCGCAGCGG<br>TATCAGAGCCAGGTTTCGAT                            | Met-tRNA forward primer<br>Met-tRNA reverse primer                                                                                         |
| FK268<br>FK267 | atgggtttgaagaagccaagccactta<br>gtggtaaaggacttcaagcccacgacc                              | CmPP16 GB acc.# AF079170 reverse primer (Ruiz-Medrano et al., 1999)<br>CmPP16 GB acc.# AF079170 forward primer (Ruiz-Medrano et al., 1999) |
| FK270<br>FK269 | ttgtcgaagccaatgactctgatgaa<br>atggcttccatcgtctcatccgcc                                  | C.max RUBISCO small SU reverse (Ruiz-Medrano et al., 1999)<br>C.max RUBISCO small SU forward (Ruiz-Medrano et al., 1999)                   |

## Oligonucleotides used to detect small PS RNAs in northern blot assays:

| Name  | Sequence (5' to 3')       | Template Acc.# / target sequence       |
|-------|---------------------------|----------------------------------------|
| FK311 | CACGCTTAACTGCGGAGTTCTGATG | 5S rRNA antisense probe                |
| FK310 | CATCAGAACTCCGCAGTTAAGCGTG | 5S rRNA sense probe                    |
| FK439 | AATCAAGAAAGAGCTCTCAG      | 18S rRNA 3' end antisense probe        |
| FK438 | CTGAGAGCTCTTTCTTGATT      | 18S rRNA 3' end sense probe            |
| FK458 | TTCACAGTCTGAATTAGTTC      | 18S rRNA 5' end antisense probe        |
| FK457 | GAACTAATTCAGACTGTGAA      | 18S rRNA 5' end sense probe            |
| FK456 | ACGAATCGGAGCGACGAAGGGC    | 26S rRNA 3' end antisense probe        |
| FK459 | GCCCTTCGTCGCTCCGATTTCGT   | 26S rRNA 3' end sense probe            |
| FK305 | TTAATGCCCCCAATTGAGTTACAAG | 7S SRP RNA >42_31_2s antisense probe   |
| FK304 | CTTGTAACTCAATTGGGGGCATTAA | 7S SRP RNA >42_31_2s sense probe       |
| FK309 | GGGAGCCCTTCCAGAAATTCTCGAA | U4 snRNA >42up1_2s antisense probe     |
| FK308 | TTCGAGAATTTCTGGAAGGGCTCCC | U4 snRNA >42up1_2s sense probe         |
| FK307 | GCGCCAGGCCCATGCCGTAGTGCAA | U2 snRNA >85_95_6_2S antisense probe   |
| FK306 | TTGCACTACGGCATGGGCCTGGCGC | U2 snRNA >85_95_6_2S sense probe       |
| FK362 | GGAACGAACCCGGGTCACCC      | tRNA-Asp (GAC) antisense probe (41-60) |
| FK363 | GGGTGACCCGGGTTTCGTTCC     | tRNA-Asp (GAC) sense probe (41-60)     |
| FK368 | AACCCACGACCACAAGGTTA      | tRNA-Lys (CTT) antisense probe (36-55) |
| FK367 | TAACCTTGTGGTTCGTGGGTT     | tRNA-Lys (CTT) sense probe (36-55)     |
| FK370 | ATCCTAACCGTTGGACTACA      | tRNA-Gly (GGA) antisense probe (6-25)  |
| FK369 | TGTAGTCCAACGGTTAGGAT      | tRNA-Gly (GGA) sense probe (6-25)      |
| FK358 | CTTCCGCTGCGCCACTCTGA      | tRNA-Met (ATG) antisense probe (8-27)  |
| FK359 | TCAGAGTGGCGCAGCGGAAG      | tRNA-Met (ATG) sense probe (8-27)      |
| FK361 | TGGTATCAGAGCCAGGTTTC      | tRNA-Met (ATG) antisense probe (53-72) |
| FK360 | GAAACCTGGCTCTGATACCA      | tRNA-Met (ATG) sense probe (53-72)     |
| FK372 | GGGTGAGAGCCGAGTATCCT      | tRNA-Glu (GAG) antisense probe (22-41) |
| FK371 | AGGATACTCGGCTCTCACCC      | tRNA-Glu (GAG) sense probe (22-41)     |

|       |                      |                                        |
|-------|----------------------|----------------------------------------|
| FK376 | TTCCGAGAATCGAACTCGGG | tRNA-Pro (CCA) antisense probe (47-66) |
| FK375 | CCCGAGTTCGATTCTCGGAA | tRNA-Pro (CCA) sense probe (47-66)     |
| FK374 | TGAGAGATTGAACTCTCGC  | tRNA-Ser (AGC) antisense probe (56-75) |
| FK373 | GCGAGAGTTCGAATCTCTCA | tRNA-Ser (AGC) sense probe (56-75)     |
| FK460 | TTCCACTGGGGATCGAACCC | tRNA-Arg (CGT) antisense (31-50)       |
| FK494 | GGGTCGATCCCCAGTGGA   | tRNA-Arg (CGT) sense (31-50)           |
| FK415 | CAGGTCGCTGGATTCAAAGT | tRNA-Gln (CAA) antisense (31-50)       |
| FK506 | ACTTTGAATCCAGCGACCTG | tRNA-Gln (CAA) sense (31-50)           |
| FK399 | CGTACCTCTCGCATGCTAAG | tRNA-Ala (GCT) antisense probe (31-50) |
| FK492 | CTTAGCATGCGAGAGGTACG | tRNA-Ala (GCT) sense probe (31-50)     |
| FK411 | GCAACCTTCTGATCTGGAGT | tRNA-Trp (TGG) antisense probe (30-49) |
| FK498 | ACTCCAGATCAGAAGGTTGC | tRNA-Trp (TGG) sense probe (30-49)     |
| FK413 | CCTCCGCTATACCAACAGAG | tRNA-Tyr (TAC) antisense probe (11-30) |
| FK504 | CTCTGTTGGTATAGCGGAGG | tRNA-Tyr (TAC) sense probe (11-30)     |
| FK377 | CTGACGCTCTCCCAACTGAG | tRNA-Phe (TTC) antisense probe (11-30) |
| FK485 | CTCAGTTGGGAGAGCGTCAG | tRNA-Phe (TTC) sense probe (11-30)     |
| FK414 | GGTGACCTATTGATCTGCAG | tRNA-Cys (TGC) antisense probe (31-50) |
| FK505 | CTGCAGATCAATAGGTCACC | tRNA-Cys (TGC) sense probe (31-50)     |
| FK403 | CAGGTCCCTTCGGCCTCAAC | tRNA-Leu (CTC) antisense probe (31-50) |
| FK497 | GTTGAGGCCGAAGGGACCTG | tRNA-Leu (CTC) sense probe (31-50)     |
| FK401 | CAGGTCTCCACGGCCACAAC | tRNA-His (CAC) antisense probe (31-50) |
| FK495 | GTTGTGGCCGTGGAGACCTG | tRNA-His (CAC) sense probe (31-50)     |
| FK436 | TCTAACCAGCTGAGCTATTC | tRNA-Asn (AAC) antisense probe (5-24)  |
| FK507 | GAATAGCTCAGCTGGTTAGA | tRNA-Asn (AAC) sense probe (5-24)      |
| FK437 | AGAAGGAGGGTTCGAACCTC | tRNA-Asn (AAC) antisense probe (51-70) |
| FK508 | GAGGTCGAACCTCCTTCY   | tRNA-Asn (AAC) sense probe (51-70)     |
| FK402 | AGACCTTCAGTGTGTTAGAC | tRNA-Val (GTT) antisense probe (31-50) |
| FK496 | GTCTAACACACTGAAGGTCT | tRNA-Val (GTT) sense probe (31-50)     |
| FK412 | AGACCTCCCGCTTACTAAAC | tRNA-Thr (ACT) antisense probe (31-50) |
| FK501 | GTTTAGTAAGCGGGAGGTCT | tRNA-Thr (ACT) sense probe (31-50)     |

|       |                      |                                        |
|-------|----------------------|----------------------------------------|
| FK487 | ACCAACTGAGCTACGGGACC | tRNA-Ile (ATA) antisense probe (1-20)  |
| FK486 | GGTCCCGTAGCTCAGTTGGT | tRNA-Ile (ATA) sense probe (1-20)      |
| FK357 | GTGACCTTCGCGTTATTAGC | tRNA-Ile (ATT) antisense probe (32-51) |
| FK490 | TGCTAATAACGCGAAGGTCG | tRNA-Ile (ATT) sense probe (31-50)     |

## Reference:

**Ruiz-Medrano R, Xoconostle-Cazares B, Lucas WJ** (1999) Phloem long-distance transport of CmNACP mRNA: implications for supracellular regulation in plants. *Development* **126**: 4405-4419
