# Supplementary material
Source: PubMed Central journal article supplement (PMC2675743)
Supplement: pp.108.134767_2.pdf [file pp.108.134767_2.pdf]

# Supplemental Material S2, Zhang et al. (2009)

## Sequence of fragments corresponding to *Cucurbita sp.* 5S (n=116) and 5.8S (n=1) ribosomal RNA:

Blue, green, magenta: identical; red: mismatch

### Corresponding to 5S ribosomal RNA:

```
>85_17_2s 1-81 AAGGGTGGGATCATAACCAGCACTAATGCACCGG--ATCCC--ATCAGAACTCCG--AGTTAAGCGTGCTGGGGGAGAGT---AGTACT
>II_85_30_F8_2s 1-80 AAGGGTGGGATCATAACCAGCACTAATGCACCGG--ATCCCC--ATCAGAACTCCG--AGTTAAGCGTGCTGGGGGAGAGT---AGT
>85_15_1s 1-79 GGGTGGGATCATAACCAGCACTAATGCACCGG--ATCCC--ATCAGAACTCCG--AGTTAAGCGTGCTGGGGGAGAGT---AGTACT
>85_41_3s 1-79 GGGTGGGATCATAACCAGCACTAATGCACCGG--ATCCC--ATCAGAACTCCG--AGTTAAGCGTGCTGGGGGAGAGT---AGTACT
>II_85_11_II_2s 1-79 GGGTGGGATCATAACCAGCACTAATGCACCGG--ATCCC--ATCAGAACTCCG--AGTTAAGCGTGCTGGGGGAGAGT---AGTACT
>85_14_2s 1-79 GGGTGGGATCATAACCAGCACTAATGCACCGG--ATCCC--ATCAGAACTCCG--AGTTAAGCGTGCTGGGGGAGAGT---AGTACT
>II_85_12_2s 1-79 GGGTGGGATCAGACCAGCACTAATGCACCGG--ATCCC--ATCAGAACTCCG--AGTTAAGCGTGCTGGGGGAGAGT---AGTACT
>85_20_3s 1-79 GGGTGGGATCATAACCAGCACTAATGCACCGG--ATCCC--ATCAGAACTCCG--AGTTAAGCGTGCTGGGGGAGAGT---AGTACT
>85_35_4s 1-79 GGGTGGGATCATAACCAGCACTAATGCACCGG--ATCCC--ATCAGAACTCCG--AGTTAAGCGTGCTGGGGGAGAGT---AGTACT
>85_36_2s 1-79 GGGTGGGATCATAACCAGCACTAATGCACCGG--ATCCC--ATCAGAACTCCG--AGTTAAGCGTGCTGGGGGAGAGT---AGTACT
>II_85_27_II_3s 1-79 GGGTGGGATCAGACCAGCACTAATGCACCGG--ATCCC--TACAGAACTCCG--CATTAAAGCTTGATTTGGCCAGAGT---AGTAAI
>II_85_33_F10_2s 1-79 GGGTGGGATCATAACCAGCACTAATGCACCGGATCCC--ATCAGAACTCCG--AGTTAAGCGTGCTGGGGGAGAGT---AGT
>II_85_6_E6_2s 1-79 GGGTGGGATCATAACCAGCACTAATGCACCGG--ATCCC--ATCAGAACTCCG--AGTTAAGCGTGCTGGGGGAGAGT---AGTACT
>85_14_2s 1-77 GGGTGGGATCATAACCAGCACTAATGCACCGG--ATCCC--ATCAGAACTCCG--AGTTAAGCGTGCTGGGGGAGAGT---AGTACT
>85_45_4s 1-77 GGGTGGGATCATAACCAGCACTAATGCACCGG--ATCCC--ATCAGAACTCCG--AGTTAAGCGTGCTGGGGGAGAGT---AGTA
>II_85_4_E4_2s 1-77 GGGTGGGATCATAACCAGCACTAATGCACCGG--ATCCC--ATCAGAACTCCG--AGTTAAGCGTGCTGGGGGAGAGT---AGT
>II_85_15_E12_3s 1-77 AAGGGTGGGATCATAACCAGCACTAATGCACCGG--ATCCA--ATCAGAACTCCG--AGTTAAGCGTGCTGGGGGAGAGT---AGT
>II_85_45_G7_2s 1-77 GGGTGGGATCATAACCAGCACTAATGCACCGG--ATCCC--ATCAGAACTCCG--AGTTAAGCGTGCTGGGGGAGAGT---AGT
>II_85_15_E12_4s 1-76 GGGTGGGATCATAACCAGCACTAATGCACCGG--ATCCC--ATCAGAACTCCG--AGTTAAGCGTGCTGGGGGAGAGT---AGT
>85_4_4s 1-76 GGGTGGGATCATAACCAGCACTAATGCACCGG--ATCCC--ATCAGAACTCCG--AGTTAAGCGTGCTGGGGGAGAGT---AGT
>85_15_3s176 1-76 GGGTGGGATCATAACCAGCACTAATGCACCGG--ATCCC--ATCAGAACTCCG--AGTTAAGCGTGCTGGGGGAGAGT---AGT
>85_35_1s176 1-76 GGGTGGGATCATAACCAGCACTAATGCACCGG--ATCCC--ATCAGAACTCCG--AGTTAAGCGTGCTGGGGGAGAGT---AGT
>II_85_16_F1_1s 1-76 GGGTGGGATCATAACCAGCACTAATGCACCGG--ATCCC--ATCAGAACTCCG--AGTTAAGCGTGCTGGGGGAGAGT---AGT
>85_28_2s 1-76 GGGTGGGATCATAACCAGCACTAATGCACCGG--ATCCC--ATCAGAACTCCG--AGTTAAGCGTGCTGGGGGAGAGT---AGT
>85_1_4s176 1-76 GGGTGGGATCATAACCAGCACTAATGCACCGG--ATCCC--ATCAGAACTCCG--AGTTAAGCGTGCTGGGGGAGAGT---AGT
>II_85_43_II_2s 1-76 GGGTGGGATCATAACCAGCACTAATGCACCGG--ATCCC--ATCAGAACTCCG--AGTTAAGCGTGCTGGGGGAGAGT---AGT
>85_16_4s 1-76 GGGTGGGATCATAACCAGCACTAATGCACCGG--ATCCC--ATCAGAACTCCG--AGTTAAGCGTGCTGGGGGAGAGT---AGT
>85_38_1s 1-76 GGGTGGGATCATAACCAGCACTAATGCACCGG--ATCCC--ATCAGAACTCCG--AGTTAAGCGTGCTGGGGGAGAGT---AGT
>II_85_1_E2_2s 1-76 GGGTGGGATCATAACCAGCACTAATGCACCGG--ATCCC--ATCAGAACTCCG--AGTTAAGCGTGCTGGGGGAGAGT---AGT
>85_51_3s 1-76 GGGTGGGATCATAACCAGCACTAATGCACCGG--ATCCC--ATCAGAACTCCG--AGTTAAGCGTGCTGGGGGAGAGT---AGT
>85_4_3s 1-76 GGGTGGGATCATAACCAGCACTAATGCACCGG--ATCCC--ATCAGAACTCCG--AGTTAAGCGTGCTGGGGGAGAGT---AGT
>II_85_3_E3_1s 1-76 GGGTGGGATCATAACCAGCACTAATGCACCGG--ATCCC--ATCAGAACTCCG--AGTTAAGCGTGCTGGGGGAGAGT---AGT
>II_85_3_II_4s 1-76 GGGTGGGATCATAACCAGCACTAATGCACCGG--ATCCC--ATCAGAACTCCG--AGTTAAGCGTGCTGGGGGAGAGT---AGT
>II_85_30_F8_1s 1-76 GGGTGGGATCATAACCAGCACTAATGCACCGG--ATCCC--ATCAGAACTCCG--AGTTAAGCGTGCTGGGGGAGAGT---AGT
>II_85_16_F1_2s 1-76 GGGTGGGATCATAACCAGCACTAATGCACCGG--ATCCC--ATCAGAACTCCG--AGTTAAGCGTGCTGGGGGAGAGT---AGT
>85_95_4_2s 1-76 GGGTGGGATCATAACCAGCACTAATGCACCGG--ATCCT--ATCAGAACTCCG--AGTTAAGCGTGCTGGGGGAGAGT---AGT
>85_38_3s 1-76 GGGTGGGATCATAACCAGCACTAATGCACCGG--ATCCC--ATCAGAACTCCG--AGTTAAGCGTGCTGGGGGAGAGT---AGT
>I_85_72_H12_1s 1-76 GGGTGGGATCATAACCAGCACTAATGCACCGG--ATCCC--ATCAGAACTCCG--AGTTAAGCGTGCTGGGGGAGAGT---AGT
>II_85_24_F5_1s 1-76 GGGTGGGATCATAACCAGCACTAATGCACCGG--ATCCC--ATCAGAACTCCG--AGTTAAGCGTGCTGGGGGAGAGT---AGT
>II_85_33_F10_1s 1-76 GGGTGGGATCATAACCAGCACTAATGCACCGG--ATCCC--ATCAGAACTCCG--AGTTAAGCGTGCTGGGGGAGAGT---AGT
>85_29_2s 1-76 GGGTGGGATCATAACCAGCACTAATGCACCGG--ATCCC--ATCAGAACTCCG--AGTTAAGCGTGCTGGGGGAGAGT---AGT
>II_85_22_F4_2s 1-76 GGGTGGGATCATAACCAGCACTAATGCACCGG--ATCCC--ATCAGAACTCCG--AGTTAAGCGTGCTGGGGGAGAGT---AGT
>85_51_1s 1-76 GGGTGGGATCATAACCAGCACTAATGCACCGG--ATCCC--ATCAGAACTCCG--AGTTAAGCGTGCTGGGGGAGAGT---AGT
>85_46_2s 1-76 GGGTGGGATCATAACCAGCACTAATGCACCGG--ATCCC--ATCAGAACTCCG--AGTTAAGCGTGCTGGGGGAGAGT---AGT
>II_85_27_II_4s 1-76 GGGTGGGATCATAACCAGCACTAATGCACCGG--ATCCC--ATCAGAACTCCG--AGTTAAGCGTGCTGGGGGAGAGT---AGT
>II_85_43_II_3s 1-76 GGGTGGGATCATAACCAGCACTAATGCACCGG--ATCCC--ATCAGAACTCCG--AGTTAAGCGTGCTGGGGGAGAGT---AGC
>II_85_43_G5_1s 1-76 GGGTGGGATCATAACCAGCACTAATGCACCGG--ATCCC--ATCAGAACTCCG--AGTTAAGCGTGCTGGGGGAGAGT---AGC
>II_85-49_G9_2s 1-76 GGGTGGGATCATAACCAACTAATGCACCGG--ATCCC--ATCAGAACTCCG--AGTTAAGCGTGCTGGGGGAGAGT---ACC
>II_85-50_G10_2s 1-76 GGGTGGGATCATAACCAGCACTAATGCACCGG--ATCCC--ATCAGAACTCCG--AGTTAAGCGTGCTGGGGGAGAGT---ACA
>85_19_2s 1-75 GGGTGGGATCATAACCAGCACTAATGCACCGG--ATCCC--ATCAGAACTCCG--AGTTAAGCGTGCTGGGGGAGAGT---AG
>85_21_2s 1-75 GGGTGGGATCATAACCAGCACTAATGCACCGG--ATCCC--ATCAGAACTCCG--AGTTAAGCGTGCTGGGGGAGAGT---AG
>85_22_2s 1-75 GGGTGGGATCATAACCAGCACTAATGCACCGG--ATCCC--ATCAGAACTCCG--AGTTAAGCGTGCTGGGGGAGAGT---AG
>85_26_1s 1-74 GGGTGGGATCATAACCAGCACTAATGCACCGG--ATCCC--ATCAGAACTCCG--ATGTTAAGCGTGCTGGGGGAGAG---T
>85_6_3s 1-73 GGGTGGGATCATAACCAGCCCTAATGCACCGG--ATCCC--ATCAGAACTCCG--AGTTCCCCCTGGGGGAGAGT
>85_1_2s 1-73 GGGTGGGATCATAACCAGCACTAATGCACCGG--ATCCC--ATCAGAACTCCG--AGTTAAGCGTGCTGGGGGAGAGT
>I_85_62_II_2s 1-73 GGGTGGGATCATAACCAGCACTAATGCACCGG--ATCCC--ATCAGAACTCCG--AGTTAAGCGTGCTGGGGGAGAGT
>I_85_62_H9_2s 1-73 GGGTGGGATCATAACCAGCACTAATGCACCGG--ATCCC--ATCAGAACTCCG--AGTTAAGCGTGCTGGGGGAGAGT
>85_33_3s 1-73 GGGTGGGATCATAACCAGCACTAATGCACCGG--ATCCC--ATCAGAACTCCG--AGTTAAGCGTGCTGGGGGAGAGT
```

```

>85_12_3s      1-73  GGGTGGCGATCATACCAGCACTAATGCACCGG--ATCCC--ATCAGAACTCCG--AGTTAAGCGTGCTTGGCGGAGAGT
>85_43_2s      1-73  GGGTGGCGATCATACCAGCACTAATGCACCGG--ATCCC--ATCAGAACTCCG--AGTTAAGCGTGCTTGGCGGAGAGT
>85_6_1s       1-73  GGGTGGCGATCATACCAGCACTAATGCACCGG--ATCCC--ATCAGAACTCCG--AGTTAAGCGTGCTTGGCGGAGAGT
>85_12_2s      1-73  GGGTGGCGATCATACCAGCACTAATGCACCGG--ATCCC--ATCAGAACTCCG--AGTTAAGCGTGCTTGGCGGAGAGT
>85_46_3s      1-73  GGGTGGCGATCATACCAGCACTAATGCACCGG--ATCCC--ATCAGAACTCCG--AGTTAAGCGTGCTTGGCGGAGAGT
>85_51_2s      1-73  GGGTGGCGATCATACCAGCACTAATGCACCGG--ATCCC--ATCAGAACTCCG--AGTTAAGCGTGCTTGGCGGAGAGT
>85_17_3s      1-73  GGGTGGCGATCATACCAGCACTAATGCACCGG--ATCCC--ATCAGAACTCCG--AGTTAAGCGTGCTTGGCGGAGAGT
>II_85_13_E10_3s  1-73  GGGTGGCGATCATACCAGCACTAATGCACCGG--ATCCC--ATCAGAACTCCG--AGTTAAGCGTGCTTGGCGGAGAGT
>85_16_2s      1-73  GGGTGGCGATCATACCAGCACTAATGCACCGG--ATCCC--ATCAGAACTCCG--AGTTAAGCGTGCTTGGCGGAGAGT
>II_85_13_II_2s  1-73  GGGTGGCGATCATACCAGCACTAATGCACCGG--ATCCC--ATCAGAACTCCG--AGTTAAGCGTGCTTGGCGGAGAGT
>II_85_28_F7_1s  1-73  GGGTGGCGATCATACCAGCACTAATGCACCGG--ATCCC--ATCAGAACTCCG--AGTTAAGCGTGCTTGGCGGAGAGT
>85_9_4s       1-73  GGGTGGCGATCATACCAGCACTAATGCACCGG--ATCCC--ATCAGAACTCCG--AGTTAAGCGTGCTTGGCGGAGAGT
>85_42_2s      1-73  GGGTGGCGATCATACCAGCACTAATGCACCGG--ATCCC--ATCAGAACTCCG--AGTTAAGCGTGCTTGGCGGAGAGT
>85_42_1s      1-73  GGGTGGCGATCATACCAGCACTAATGCACCGG--ATCCC--ATCAGAACTCCG--AGTTAAGCGTGCTTGGCGGAGAGT
>85_40_2s      1-73  GGGTGGCGATCATACCAGCACTAATGCACCGG--ATCCC--ATCAGAACTCCG--AGTTAAGCGTGCTTGGCGGAGAGT
>85_37_2s      1-73  GGGTGGCGATCATACCAGCACTAATGCACCGG--ATCCC--ATCAGAACTCCG--AGTTAAGCGTGCTTGGCGGAGAGT
>85_28_1s      1-73  GGGTGGCGATCATACCAGCACTAATGCACCGG--ATCCC--ATCAGAACTCCG--AGTTAAGCGTGCTTGGCGGAGAGT
>85_14_3s      1-73  GGGTGGCGATCATACCAGCACTAATGCACCGG--ATCCC--ATCAGAACTCCG--AGTTAAGCGTGCTTGGCGGAGAGT
>85_1_1s       1-73  GGGTGGCGATCATACCAGCACTAATGCACCGG--ATCCC--ATCAGAACTCCG--AGTTAAGCGTGCTTGGCGGAGAGT
>II_85_1_E2_1s  1-73  GGGTGGCGATCATACCAGCACTAATGCACCGG--ATCCC--ATCAGAACTCCG--AGTTAAGCGTGCTTGGCGGAGAGT
>II_85_44_II_4s  1-73  GGGTGGCGATCATACCAGCACTAATGCACCGG--ATCCC--ATCAGAACTCCG--AGTTAAGCGTGCTTGGCGGAGAGT
>II_85_13_II_3s  1-73  GGGTGGCGATCATACCAGCACTAATGCACCGG--ATCCC--ATCAGAACTCCG--AGTTAAGCGTGCTTGGCGGAGAGT
>I_85_62_II_3s  1-73  GGGTGGCGATCATACCAGCACTAATGCACCGG--ATCCC--ATCAGAACTCCG--AGTTAAGCGTGCTTGGCGGAGAGT
>85_44_1s      1-73  GGGTGGCGATCATACCAGCACTAATGCACCGG--ATCCC--ATCAGAACTCCG--AGTTAAGCGTGCTTGGCGGAGAGT
>II_85_13_E10_2s  1-72  GGGTGGCGATCATACCAGCACTAATGCACCGG--ATCCC--ATCAGA-CTCCG--AGTTAAGCGTGCTTGGCGGAGAGT
>85_7_3s       1-72  GGGTGGCGATCATACCAGCACTAATGCACCGG--ATCCC--ATCAGAACTCCG--AGTTAAGCGTGCTTGGCGGAGAG-
>85_28_3s      1-72  GGGTGGCGATCATACCAGCACTAATGCACCGG--ATCCC--ATCAGAACTCCG--AGTTAAGCGTGCTTGGCGGAGAG-
>85_50_2s      1-71  GGGTGGCGATCATACCAGCACTAATGCACCGG--ATCCC--ATCAGAACTCCG--AGTTAAGCGTGCTTGGCGGAGAG-
>85_35_3s      1-71  GGGTGGCGATCATACCAGCACTAATGCACCGG--ATCCC--ATCAGAACTCCG--AGTTAAGCGTGCTTGGCGGAGAG-
>II_85_35_F11_3s  1-74  AGGTGGCGATCATACCAGCACTAATGCACCGG--ATCCC--ATCAGACTCCG--AGTTAAGCGTGCTTGGCGGAGAGT
>85_95_5_1s    1-72  GGGTGGCGATCATACCAGCACTAATGCACCGG--ATCCC--ATCAGAACTCCG--AGTTAAGCGTGCTTGGCGGAGAGT
>II_85_37_F12_2s  1-71  GGGTGGCGATCATACCAGCACTAATGCACCGG--ATCCC--ATCAGACTCCG--AGTTAAGCGTGCTTGGCGGAGAGT
>II_85_37_F12_3s  1-71  GGGTGGCGATCATACCAGCACTAATGCACCGG--ATCCC--ATCAGACTCCG--AGTTAAGCGTGCTTGGCGGAGAGT
>85_30_3s      1-72  GGGTGGCGATCATACCAGCACTAATGCACCGG--ATCCC--ATCAGACTCCG--AGTTAAGCGTGCTTGGCGGAGAG-
>I_85_62_H9_3s  1-70  GGGTGGCGATCATACCAGCACTAATGCACCGG--ATCCC--ATCAGACTCCG--AGTTAAGCGTGCTTGGCGGAGAGT
>85_31_1s      1-67  GGGTGGCGATCATACCAGCACTAATGCACCGG--ATCCC--ATCAGACTCCG--AGTTAAGCGTGCTTGGCGGAGAGT
>II_85_8_E7_3s  1-69  GGGTGGCGATCATACCAGCACTAATGCACCGG--ATCCC--ATCAGACTCCG--AGTTAAGCGTGCTTGGCGGAGAGT
>II_85_50_II_1s  1-67  GGGTGGCGATCATACCAGCACTAATGCACCGG--ATCCC--ATCAGACTCCG--AGTTAAGCGTGCTTGGCGGAGAGT
>II_85_27_II_1s  1-67  GGGTGGCGATCATACCAGCACTAATGCACCGG--ATCCC--ATCAGACTCCG--AGTTAAGCGTGCTTGGCGGAGAGT
>II_85_38_G1_2s  1-77  GGGTGGCGATCATACCAGCACTAATGCACCGG--ATCCC--ATCAGACTCCG--AGTTAAGCGTGCTTGGCGGAGAGT
>II_85_14_E11_2s  1-74  GGGTGGCGATCATACCAGCACTAATGCACCGG--ATCCC--ATCAGACTCCG--AGTTAAGCGTGCTTGGCGGAGAGT
>I_85_60_II_3s  1-74  GGGTGGCGATCATACCAGCACTAATGCACCGG--ATCCC--ATCAGACTCCG--AGTTAAGCGTGCTTGGCGGAGAGT
>I_85_67_H10_2s  1-83  GGTCCGGAACATAGCAGCACTAATGCACCGG--ATCCC--ATCAGACTCCG--AGTTAAGCGTGCTTGGCGGAGAGT
>85_30_1s      1-83  GGGTGGCGATCATACCAGCACTAATGCACCGG--ATCCC--ATCAGACTCCG--AGTTAAGCGTGCTTGGCGGAGAGT
>85_6_2s       1-138 GGGTGGCGATCATACCAGCACTAATGCACCGG--ATCCC--ATCAGACTCCG--AGTTAAGCGTGCTTGGCGGAGAGT
>II_85_40_G2_3s  1-82  GGGTGGCGATCATACCAGCACTAATGCACCGG--ATCCC--ATCAGACTCCG--AGTTAAGCGTGCTTGGCGGAGAGT
>85_95_5_2s    1-88  GGGTGGCGATCATACCAGCACTAATGCACCGG--ATCCC--ATCAGACTCCG--AGTTAAGCGTGCTTGGCGGAGAGT
>II_85_49_1s   1-84  GGGTGGCGATCATACCAGCACTAATGCACCGG--ATCCC--ATCAGACTCCG--AGTTAAGCGTGCTTGGCGGAGAGT
>II_85_27_F6_2s  1-71  GGGTGGCGATCATACCAGCACTAATGCACCGG--ATCCC--ATCAGACTCCG--AGTTAAGCGTGCTTGGCGGAGAGT
>II_85_44_G6_2s  1-64  GGCCGGCAATGCCAGCACTAATGCACCGG--ATCCC--ATGAGACTCTC-ACCTA-----TCGTGGCT
>II_85_38_II_3s  1-73  GGTACGACCAACCAGCGCTAATGCACCGG--ATCCC--ATCAGACTCCG--AGTTAAGCGTGCTTGGCGGAGAGT
>II_85_41_G3_3s  1-68  GGGTGGCGATCATACCAGCACTAATGCACCGG--ATCCC--ATCAGACTCCG--AGTTAAGCGTGCTTGGCGGAGAGT
>II_85_49_3s   1-70  GATCAAGATGGACCGTACTAATGCACCGG--ATCCC--ATCAGACTCCG--AGTTAAGCGTGCTTGGCGGAGAGT
>85_19_5s      1-30  -----TCCGCG--AGTTAAGCGTGCTTGGCGGAGAGT
>II_85_43_G5_2s  1-76  GGGTGGCGATCATACCAGCACTAATGCACCGG--ATCCC--ATCAGACTCCG--AGTTAAGCGTGCTTGGCGGAGAGT--AGT
>II_85_42_G4_2s  1-77  -GGTGGCGATCA-ACCGGCACTAATGCACCGG--ATCCC--ATCAGACTCCG--AGTTAAGCGTGCTTGGCGGAGAGT--AGTACT-----
>85_3_3s       1-45  -----CC--ATTAGAAATAAGA--AATAAAGCGTGCTTGGCGGAGAGT--AGTACT-----
>II_8535_F11_2s  1-66  -----AGTTAAGCGTGCTTGGCGGAGAGT--AGTACTAAGTTGGGTGACCACTTGGGAAGTCCCTCGTGTGC-----
>85_28_4s      1-71  -----AGTTAAGCGTGCTTGGCGGAGAGT--AGTACTAAGTTGGGTGACCACTTGGGAAGTCCCTCGTGTGCATCCCT

```

Reference sequence (assembled by the uncovered sequences):

5S RNA C. max 1-120 GGGTGGCGATCATACCAGCACTAATGCACCGG--ATCCC--ATCAGAACTCCG--AGTTAAGCGTGCTTGGCGGAGAGT--AGTACTAAGTTGGGTGACCACTTGGGAAGTCCCTCGTGTGCATCCCT

Corresponding to 5.8S ribosomal RNA

>85\_2\_1s 1-82 GTAGCGAAATGCGATACTTGGTGTGAATTGCAGGATCCCGCGAACCACCGAGTCTTTGAACGCAAGTTGCGCCCGGAGCCTT

Reference sequence: Cucumis pepo 5.8S ribosomal RNA (AJ488214) (163 bases):

caacgactctcggcaacggatattctcggtctctcgatcgatgaagaacgtagcgaagtgcgatacttgggtgtaattgcaggatccccgcgaaccacgagctcttgaacgcaagtgcgccccggagcctctctggccgagggcacgtctgctggggcgtcacgc

Sequence of fragments (n=110) corresponding to Cucurbita sp. 18S ribosomal RNA:

Blue, green, magenta, orange, brown: identical; red: mismatch/not found.

Matching from 1 to 76 (note the 27 additional Arabidopsis 18S RNA nucleotides at 5' end, brown):

>85\_38\_2s 1-76 TACCTGGTTGATCC-TGCCAGTAGTCAATGCTT-GTCTCAAAGATTAAGCCATGCATGTGTAAGTATGAACATAATTC
>85\_41\_2s 1-72 TACCTGGTTGATCC-TGCCAGTAGTCAATGCTT-GTCTCAAAGATTAAGCCATGCATGTGTAAGTATGAACATA---
>85\_45\_3s 1-73 TACCTGGTTGATCC-TGCCAGTAGTCAATGCTT-GTCTCAAAGATTAAGCCATGCATGTGTAAGTATGAACATA---
>II\_85\_22\_F4\_3s 1-76 TACCTGGTTGATCCCTGCCAGTAGTCAATGCTTTGTCTCAAAGATAAGCCATGCATGTGTAAGTTGAAC----- (CTG)

Matching from 113 to 174:

>85\_16\_5s 1-62 ATAGTTTGTGGTATTTGCTACTCGGATAACCGTAGTAATTTAGAGCTAATACGTGC

Matching from 203 to 258:

>85\_9\_3s 1-56 ATTTATTAGATAAAAAGGTCGACGCGGGCTCTGCCCGTTGCTCTGATGATTCATGAT

Matching from 267 to 373:

>II\_85\_22\_F4\_1s 1-59 AACT-GACGGATCGCACGGCCATCGTGCCGGCAGCCATCAATCAAAATTTCTGCCCTATC-----
>II\_85\_18\_F2\_2as 1-71 -----AAATTTCTGCCCTATCAACTTTCGATGGTAGGATAGTGGCCTACTATGGTGGTACGGGTGACGGAGAATT
>II\_85\_19\_F3\_2s 1-68 ----- (TAA) --AAA-TTCTGCC-TATCAACTT-CGATGGTAGGATAGTGGCCTACTATG--GGGACGGGTGA-GGAGAATT

Matching from 374 to 439:

>II-85-14\_E11\_1s 1-66 AGGGTTCGATTCCGGAGAGGGAGCCTGAGAAACGGCTACCCACATCCAAGGAA-GGCAGCAGGGCGCC
>85\_43\_4s 1-66 AGGGTTCGATTCCGGAGAGGGAGCCTGAGAAACGGCTACCCACATCCAAGGAA-GGCAGCAGGGCGCC
>85\_14\_4s 1-66 AGGGTTCGATTCCGGAGAGGGAGCCTGAGAAACGGCTACCCACATCCAAGGAA-GGCAGCAGGGCGCC
>85\_4\_2s 1-66 AGGGTTCGATTCCGGAAAGGGAGCCTGAGAAACGGCTACCCACATCCAAGGAA-GGCAGCAGGGCGCC
>I-85-67\_H10\_1s 1-66 AGGGTTCGATTCCGGAGAGGGAGCCTGAGAAACGGCTACCCACATCCAAGGAA-GGCAGCAGGGCGC
>85\_43\_1s 1-66 AGGGTTCGATTCCGGAGAGGGAGCCTGAGAAACGGCTACCCACATCCAAGGAA-GGCAGCAGGGCGC
>85\_5\_5s 1-62 --GGTTCGATTCCGGAGAGGGAGCCTAA-AAACGGCTACC-CATCCAAGGAA-GGCAGCAGGGCGCC
>II-85-15\_E12\_2s 1-68 AGGGTTCGATTCCGGAGAGGGAGCCTGAGAAACGGCTACCCACATCCAAGGAAAGGCAGCAGGGCGCC--C
>I-85-67\_H10\_4s 1-68 AGGG-TCGAT-CCTGAAAGGGAGCCTGAGAAACG-C-AACACATCCAAGGAA-GGC-GCAGCCGCC-- (GTAGCAC)

Matching from 449 to 587:

>85\_31\_3s 1-60 AATCTGACACGGGGAGGTAGTGACAATAAATAACAATACCGGGCTCTTCGAGTCTGGTA-----
>II-85-13\_II\_1s 1-67 -----TCGAGTCTGGTAATTGGAATGAGTACAATCTAAATCCCTTAACGAGGATCAATTGGAGGGCAAGTCT-----
>85\_1\_5s 1-60 -----AAATCCCTTAACGAGGATCAATTGGAGGGCAAGTCTGGTGGCCAGCAGCC-GCGTAATTCC
>I-85-70\_H11\_2s 1-60 -----AAATCCCTTAACGAGGATCAATTGGAGGGCAAGTCTGGT-CCAGCAGCCCGGTAATTCC

Matching from 633 to 707:

>85\_23\_2s 1-63 AGTTGGACCTT-GGGTTGGGTC-GATCGGTCGCCCTATGGTGAGCACCGATTGGCTCGTCCCTTC-----
>85\_20\_1s 1-64 AGTTGGACCTT-GGGTTGGGTC-GATCGGTCGCCCTATGGTGAGCACCGATTGGCTCGTCCCTTC-----
>85\_4\_5s 1-62 -----TGGTTG-TTC-GATCGGTCGCCCTATGGTGAGCACCGATTGGCTCG-CCCTTCTGTCGGCGATGC
>85\_35\_2s 1-67 -----CTT-GGGTTGGGTC-GATCGGTCGCCCTATGGTGAGCACCGATTGGCTCGTCCCTTCTGTCGGCGATGC
>85\_26\_2s 1-66 -----TT-GGGTTGGGTC-GATCGGTCGCCCTATGGTGAGCACCGATTGGCTCGTCCCTTCTGTCGGCGATGC
>42\_28\_2s 1-38 -----TGSTGAGCACCGATTGGCTCGTCCCTTCTGTCGGCGAT--
>II-85-48\_G8\_3s 1-111 -----CTT-GGTTGGG-TCCGATCGGTCGCCCTATGGTGAGCACCGATTGGCTCGCCTTCGTTAGCGATGC----- (CTGTGGGCCCATCAACATTGTAGGCATTGACCTTTAAGAAA)

Matching from 720 to 796:

>85\_19\_1s 1-84 CCTCAAAACTGGCCGGGTCGTGCCCTCCGG-CGCTGTTACTTTGAAGAAATAGAGTGCCTAAA-GCAAG-CCTACGCTCTGTATAC
>85\_21\_1s 1-84 CCTCAAAACTGGCCGGGTCGTGCCCTCCGG-CGCTGTTACTTTGAAGAAATAGAGTGCCTAAA-GCAAG-CCTACGCTCTGTATAC
>85-22-1s 1-84 CCTCAAAACTGGCCGGGTCGTGCCCTCCGG-CGCTGTTACTTTGAAGAAATAGAGTGCCTAAA-GCAAG-CCTACGCTCTGTATAC
>85\_46\_1s 1-73 -----AACTGGCCGGGTCGTGCCCTCCGG-CGCTGTTACTTTGAAGAAATAGAGTGCCTAAA-GCAAG-CCTACGCTCTGT-----
>II-85-43\_II\_1s 1-69 -----AACTGGCCGGGTCGTGCCCTCCGG-CGCTGTCACCTTTGAAGAAATAGAGTGCCTAAA-GCAAG-CCTACGCT-----
>II\_85\_43\_G5\_3s 1-72 -----ATCTGCCGGATCGTGCCTCCGGCGCTGTCACTTTGAACAATAAGAGTGCCTAAA-GCAAGGCTCAAAAGCCTACGCT-----

Matching from 797 to 934:

>II-85-38\_II\_2s 1-71 -----ATAGATTTCGATCCTATTCTGTTGGCCCTCGGGATCGGAGTAATGATTAACAGGGACAGTCGGGGGCATT-----
>85\_10\_3s 1-69 -----ATAGATTTCGATCCTATTCTGTTGGCCCTCGGGATCGGAGTAATGATTAACAGGGACAGTCGGGGGCATT-----
>85\_1\_3s 1-71 -----ATCATAGGATTTTCGATCCTATTCTGTTGGCCCTCGGGATCGGAGTAATGATTAACAGGGACAGTCGGGGGCATT-----
>85\_8\_3s 1-69 -----ATAGATTTCGATCCTATTCTGTTGGCCCTCGGGATCGGAGTAACAGGGACAGTCGGGGGCATT-----
>85\_17\_1s 1-68 -----ATTAGCATGGGATAACATCATAGGATTTTCGATCCTATTCTGTTGGCCCTCGGGATCGGAGTAATGATTT-----
>II-85-13\_E10\_1s 1-62 -----ATGGGATAACATCATAGGATTTTCGATCCTATTCTGTTGGCCCTCGGGATCGGAGTAATGATTT-----
>II-85-13\_II\_4s 1-62 -----ATGGGATAACATCATAGGATTTTCGATCCTATTCTGTTGGCCCTCGGGATCGGAGTAATGATTT-----
>42\_3s 1-77 -----AATGATTAAACAGGGACAGTCGGGGCATTTCGTATTTTCATAGTCAGAGGTGAAATTCCTGGATTTATGAAAGACGAAC
>I-85-62\_H9\_1s 1-74 -----GATTAACAGGGACAGTCGGGGCATTTCGTATTTTCATAGTCAGAGGTGAAATTCCTGGATTTATGAAAGACGAAC
>II-85-48\_G8\_2s 1-96 (ATCAATATCGTAAAAAAAATGCAA) -----TAAACAGGGACAGTCGGGGCATTTCGTATTTTCATAGTCAGAGGTGAAATTCCTGGATTTATGAAAGACGAAC
>85\_15\_2s 1-77 -----AAGATTAAACAGGGACAGTCGGGGCATTTCGTATTTTCATAGTCAGAGGTGAAATTCCTGGATTTATGAAAGACGAAC
>II-85-48\_II\_1s 1-67 -----AGGGACAGTCGGGGCATTTCGTATTTTCATAGTCAGAGGTGAAATTCCTGGATTTATGAAAGACGAAC
>85\_34\_3s 1-67 -----AGGGACAGTCGGGGCATTTCGTATTTTCATAGTCAGAGGTGAAATTCCTGGATTTATGAAAGACGAAC
>II-85-6\_E6\_1s 1-71 -----TGATTAACAGGGACAGTCGGGGCATTTCGTATTTTCATAGTCAGAGGTGAAATTCCTGGATTTATGAAAGACGAAC
>85\_9\_2s 1-75 -----TGATTAACAGGGACAGTCGGGGCATTTCGTATTTTCATAGTCAGAGGTGAAATTCCTGGATTTATGAAAGACGAAC
>I-85-70\_H11\_1s 1-74 -----GATTAACAGGGACAGTCGGGGCATTTCGTATTTTCATAGTCAGAGGTGAAATTCCTGGATTTATGAAAGACGAAC
>85\_33\_2s 1-70 -----GATTAACAGGGACAGTCGGGGCATTTCGTATTTTCATAGTCAGAGGTGAAATTCCTGGATTTATGAAAGACGAAC
>42\_G4\_1s reverse 1-71 -----TGATTAACAGGGACAGTCGGGGCATTTCGTATTTTCATAGTCAGAGGTGAAATTCCTGGATTTATGAAAGACGAAC

Matching from 1084 to 1126:

>II\_42\_83\_D3\_2s 1-43 ATGAGAAATCAAAGTCTTTGGGTTCCGGGGGGAGTATGGTCCG

Matching from 1141 to 1185:

>85\_31\_2s 1-47 (AG)---T-AAGG-ATTGACGGAAAGGCCACCACAGGATGGAGCCTGCGGCTT

Matching from 1211 to 1354:

>85\_9\_1s 1-79 -----ACCAGTCCAGACATAGTAAGGATTGACAGACTGAGAGCTCTTT-CTTGATTCATAGGG-TGGTGG-TGCATGGCCGTTCTT-----
>85\_13\_1s 1-79 -----ACCAGTCCAGACATAGTAAGGATTGACAGACTGAGAGCTCTTT-CTTGATTCATAGGG-TGGTGG-TGCATGGCCGTTCTT-----
>I-85-72\_H12\_2s 1-76 AGGTACCAGACCTAGTAAGGATTGACAGACTGAGAGCTCTTT-CTTGATTCATAGGG-TGGTGG-TGCATGGCCGTTCTT-----
>II-85-35\_F11\_1s 1-76 -----AGGTCCAGACATAGTAAGGATTGACAGACTGAGAGCTCTTT-CTTGATTCATAGGG-TGGTGG-TGCATGGCCGTTCTT-----
>85\_26\_3s 1-75 -----AGGTCCAGACATAGTAAGGATTGACAGACTGAGAGCTCTTT-CTTGATTCATAGGG-TGGTGG-TGCATGGCCGTTCTT-----
>85\_45\_2s 1-76 -----AGGTCCAGACATAGTAAGGATTGACAGACTGAGAGCTCTTT-CTTGATTCATAGGG-TGGTGG-TGCATGGCCGTTCTT-----
>II-85-37\_F12\_1s 1-76 -----AGGTCCAGACATAGTAAGGATTGACAGACTGAGAGCTCTTT-CTTGATTCATAGGG-TGGTGG-TGCATGGCCGTTCTT-----
>85\_15\_4s 1-76 -----AGGTCCAGACATAGTAAGGATTGACAGACTGAGAGCTCTTT-CTTGATTCATAGGG-TGGTGG-TGCATGGCCGTTCTT-----
>I-85-60\_II\_2s 1-70 -----AGACATAGTAAGGATTGACAGACTGAGAGCTCTTT-CTTGATTCATAGGG-TGGTGG-TGCATGGCCGTTCTT-----
>II-85-27\_II\_5s 1-70 -----AGACATAGTAAGGATTGACAGACTGAGAGCTCTTT-CTTGATTCATAGGG-TGGTGG-TGCATGGCCGTTCTT-----
>85\_27\_4s 1-70 -----AGACATAGTAAGGATTGACAGACTGAGAGCTCTTT-CTTGATTCATAGGG-TGGTGG-TGCATGGCCGTTCTT-----
>85\_8\_2s 1-70 -----AGACATAGTAAGGATTGACAGACTGAGAGCTCTTT-CTTGATTCATAGGG-TGGTGG-TGCATGGCCGTTCTT-----
>85\_10\_2as 1-70 -----AGACATAGTAAGGATTGACAGACTGAGAGCTCTTT-CTTGATTCATAGGG-TGGTGG-TGCATGGCCGTTCTT-----
>II-85-50\_G10\_1s 1-70 -----AGACATAGTAAGGATTGACAGACTGAGAGCTCTTT-CTTGATTCATAGGG-TGGTGG-TGCATGGCCGTTCTT-----
>II-85-49\_G9\_1s 1-70 -----AGACATAGTAAGGATTGACAGACTGAGAGCTCTTT-CTTGATTCATAGGG-TGGTGG-TGCATGGCCGTTCTT-----
>II-85-27\_F6\_1s 1-70 -----AGACATAGTAAGGATTGACAGACTGAGAGCTCTTT-CTTGATTCATAGGG-TGGTGG-TGCATGGCCGTTCTT-----
>85\_13\_3s 1-70 -----ATACATAGTAAGGATTGACAGACTGAGAGCTCTTT-CTTGATTCATAGGG-TGGTGG-TGCATGGCCGTTCTT-----
>II-85-8\_E7\_1s 1-69 -----GACATAGTAAGGATTGACAGACTGAGAGCTCTTT-CTTGATTCATAGGG-TGGTGG-TGCATGGCCGTTCTT-----
>II\_85\_41\_G3\_1s 1-69 -----GACATAGTAAGGATTGACAGACTGAGAGCTCTTT-CTTGATTCATAGGG-TGGTGG-TGCATGGCCGTTCTT-----
>II\_85\_40\_G2\_1s 1-69 -----GACATAGTAAGGATTGACAGACTGAGAGCTCTTT-CTTGATTCATAGGG-TGGTGG-TGCATGGCCGTTCTT-----
>85\_29\_1s 1-66 -----ATAGTAAGGATTGACAGACTGAGAGCTCTTT-CTTGATTCATAGGG-TGGTGG-TGCATGGCCGTTCTT-----
>85\_27\_1s 1-66 -----ATAGTAAGGATTGACAGACTGAGAGCTCTTT-CTTGATTCATAGGG-TGGTGG-TGCATGGCCGTTCTT-----
>II-85-27\_II\_2s 1-64 -----AGTAAGGATTGACAGACTGAGAGCTCTTT-CTTGATTCATAGGG-TGGTGG-TGCATGGCCGTTCTT-----
>II-85-48\_G8\_1s 1-60 -----AAGGATTGACAGACTGAGAGCTCTTT-CTTGATTCATAGGG-TGGTGG-TGCATGGCCGTTCTT-----
>II-85-50\_II\_2s 1-66 -----AAGTAAGGATTGACAGACTGAGAGCTCTTT-CTTGATTCATAGGG-TGGTGG-TGCATGGCCGTTCTT-----
>I-85-48\_II\_3s 1-61 -----AAGGATTGACAGACTGAGAGCTCTTT-CTTGATTCATAGGG-TGGTGG-TGCATGGCCGTTCTT-----
>II\_42-19\_II\_2s 1-62 -----AAGGATTGACAGACTGAGAGCTCTTT-CTTGATTCATAGGG-TGGTGG-TGCATGGCCGTTCTT-----
>I-85-60\_II\_5s 1-61 -----AAGGATTGACAGACTGAGAGCTCTTT-CTTGATTCATAGGG-TGGTGG-TGCATGGCCGTTCTT-----
>85\_27\_3s 1-61 -----AAGGATTGACAGACTGAGAGCTCTTT-CTTGATTCATAGGG-TGGTGG-TGCATGGCCGTTCTT-----
>I-85-60\_H8\_1 1-61 -----AAGGATTGACAGACTGAGAGCTCTTT-CTTGATTCATAGGG-TGGTGG-TGCATGGCCGTTCTT-----
>II-85-49\_2s 1-54 -----AGTAAGGATTGACAGACTGAGAGCTCTTT-CTTGATTCATAGGG-TGGTGG-TGCATGGCCGTTCTT-----
>I-85-62\_II\_1s 1-40 -----AAGGATTGACAGACTGAGAGCTCTTT-CTTGATTCATAGGG-TGGTGG-TGCATGGCCGTTCTT-----
>42up7\_1s 1-45 -----GAGAGCTTTTTCTTGATTCATAGGG-TGGTGG-TGCATGGCCGTTCTT-----
>85\_13\_4s 1-78 -----ATAGTAAGGATTGACAGACTGAGAGCTCTTT-CTTGATTCATAGGG-TGGTGG-TGCATGGCCGTTCTT-----
>I-85-62\_H9\_4s 1-83 -----AAGTTTCAGACGGAAGCTATT-CTTGATTCATAGGG-TGGTGG-TGCATGGCCGTTCTT-----
>85\_19\_3s 1-88 -----AGACATAGTAAGGATTGACAGACTGAGAGCTCTTT-CTTGATTCATAGGG-TGGTGG-TGCATGGCCGTTCTT-----
>85\_3\_1s 1-88 -----AGTAAGGATTGACAGACTGAGAGCTCTTT-CTTGATTCATAGGG-TGGTGG-TGCATGGCCGTTCTT-----
>85\_2\_2s 1-79 -----CTTGATTCATAGGG-TGGTGG-TGCATGGCCGTTCTT-----
>II\_85\_1\_E2\_3s 1-70 -----TTGATTCATAGGG-TGGTGG-TGCATGGCCGTTCTT-----
>II-85-44\_G6\_1s 1-77 -----CTATGGG-TGGTGG-TGCATGGCCGTTCTT-----
>II-85-44\_II\_5s 1-76 -----CTATGGG-TGGTGG-TGCATGGCCGTTCTT-----
>85\_7\_2s 1-77 -----CTATGGG-TGGTGG-TGCATGGCCGTTCTT-----
>II-85-44\_II\_1s 1-76 -----CTATGGG-TGGTGG-TGCATGGCCGTTCTT-----
>85\_4\_1s 1-77 -----ATGGCCCTTCTTACTTGGTGGAGCGATTGCTCGGTTAAATCCGTTAACGAACGAGACCTCAGCCCTGTAAGTACTAGCT-
>85\_20\_2s 1-77 -----ATGGCCCTTCTTACTTGGTGGAGCGATTGCTCGGTTAAATCCGTTAACGAACGAGACCTCAGCCCTGTAAGTACTAGCT-
>85\_5\_2s 1-77 -----CTATGGG-TGGTGG-TGCATGGCCGTTCTT-----
>42\_27\_2s 1-41 -----TGGG-TGGTGG-TGCATGGCCGTTCTT-----

```

>II_42-73_C12_1s      1-42      -----TATGGG-TGGTGG-TGCATGGCCGTTCTTAGTTGGTGGAGCGAT-----
Matching from 1426 to 1538:
>85_2_4s              1-63      -----ACTGATGTATTCACAGAGTCTATAGCCTTGGCCGACAGGCCCGGTAATCTTTGAAAATTCAT
>85_33_1s             1-71      AATAACAGGTCGTGATGCCCTTAGATGTTCTGGCCGACCGGCGCTACACTGATGTATTCACAGAGTCT-----
Matching from 1589 to 1663:
>85_43_3s             1-75      ---AGTAAGCGCGAGTCATCAGCTCGCGTTGACTACGTCCTGCCCTTTGTACACACCGCCCGTCCCTCCTACCGATT
>II-85-31_F9_2S      1-70      ---AGTAAGCGCGAGTCATCAGCTCGCGTTGACTACGTCCTGCCCTTGGTCCACACCGCCCGTCCCTAC-----
>I-85-67_H10_3s     1-74      ---AGTAAGCGCGAGTCATCAGCTCGCGTTGACTACGTCCTGCCCTTTGACCACACCGCC-GTCGCTCCTACTGATT
>42_8_3s             1-41      -----CGTTGACTACGTCCTGCCCTTTGTACACACCGCCCGT----- (TTT)
Matching from 1664 to 1707:
>42up2_2s            1-44      GAATGGTCCGGTGAAGTATTGGGATCGTGGCGACGTGGCCGTT

```

Reference sequence (1757 bases): *Cucurbita pepo* 18S ribosomal RNA gene (GenBank acc # AF206895) plus the missing 26 bases (5' end; brown underlined) from 5' *A. thaliana* 18S rRNA (TAIR acc # AT3G41768):

```

TACCTGGTGTGATCCTGCCAGTACTCATATGCTTGTCTCAAAGATTAAAGCCATGCATGTCTAACTATGAACATAATTCAGACTGTGAACTCGAATGGCTCATTAAATCAGTTATAGTTFGTTGATGGTATTTGCTACTCGGATAACCGTAGTAATTCAGAGCTAATACGTGCACAAACCCCGACTTCTGGAAAGGATG
CATTTATAGATAAAGGTCGACGCGGCTCTGCGGCTTGCCTCTGATGATTCATGATAACTCGACGGATCGCACGGCCATCGTCCGGGACGCACTTCAAATTTCTGCCCTATCAACTTCGATGGTAGGATAGTGGCTACTATGGTGGTACCGGTGACGGAAATAGGCTCGATTCGGAGAGGGAGCCTGAG
AAACGGCTACCACTCAAGAAAGGACAGCGCCGCAAAATACCAATCTCGACAGCGGGAGGTACTGACAAATAAATAACAATAACCGGCTCTTCAGCTCTGGTAATGGAAATGATACAACTAAATCCCTAACAGAGGATCAATGGAGGGCAAGCTCTGCTCCAGCAGCCGCGGTAAATTCAGCTCCAATAGCCTAT
ATTTAAGTTGTTCAGTAAAAAGCTCGTAGTTGGACCTTGGGTTGGGTCGATCGGTCCGCCATGTTGGTGAACACCGATTGGCTCGTCCCTTCTGTCGGGATCGGCTCCTTGCCCTAACTGGCCGGGTCGCTCCCGGCGGCTTACTTTGAAGAAATAGAGTGTCAAAGCAAGCCTACGCTCTGTATACATTAGCAT
GGGATAACATCATAGGATTCGATCCTATTCGTGGCCCTTCGGGATCGGATTAATGATTAAACAGGGACAGTCGGGGCCATCGTATTTTCATAGTCAAGAGTGAAATTTCTGGATTTATGAAAGACGAACAACCTGCGAAAGCATTTCAGCAAGGATGTTTCATTAAATCAAGAACGAAAGTTGGGGCTCGAAGACGATCAG
ATACCGTCTAGTCTCAACCATAAACGATGCCGACCAAGGATTTGGCGGATGTTGCTTTAAGGACTCCGCCAGCACCTTATGAGAAATCAAAGTCTTTGGGTTCCGGGGGAGTATGGTCGCAAGGCTGAAACTTAAAGGAATTGACGGAAGGCACACACAGGATGGAGCTTGCCTCTAATTGACTCAACACGGGAA
ACTTACCAGGTCAGACATAGTAAGGATTGACAGACTGAGAGCTCTTCTTGATTCTATGGTGGTGGTGCATGGCCGTTCTTAGTTGGTGGAGCGATTGTCTGGTTAATCCGTTAACGAACGAGACCTCAGCTGCTAAGTATGCGGAGGAATCCCTCCGCGCCAGTTCCTTAGAGGACTATGGCCGCTTAG
GCCAAGGAAGTTGAGGCAATAACAGGCTGTGATGCCCTTAGATGTTCTGGGCCGACGGGCGCTACACTGATGTTTCAACAGAGTCTATAGCCTTGGCCGACAGGCCCGGTAATCTTTGAAATTCATCGTGATGGGATAGATCATTGCAATTTGTTGCTTCAACGAGGAATTCCTAGTAAGCGGAGTCAATCAG
TCGCGTTGACTACGTCCTGCCCTTTGTACACACCGCCCGTCCGCTTACCGATTGAATGGTCCGGTGAAGTGTTCGGATCGTGGCGACTGGGCGTTTCGCTGCCTGCGACGTCGCGAGAAAGTCCACTGAACCTTATCATTGAGAGGA

```

Sequence of fragments (n= 105) corresponding to *Cucurbita sp.* 26S ribosomal RNA:

Colored sequences: identical; red: mismatch/not found

Matching from 219 to 277:

>II-85-3-II\_1s 1-59 GCGCTCGGACCCCTGTCGCCACCACGAGGCGCTGTCAACGAGTCGGGTTGTTTGGGAATGC

Matching from 562 to 632:

>II\_85\_24\_F5\_2s 1-68 -AAAGGG-TGTTGGTCGATTAAGACAGCAGGACGGTGGTCATGGAAGTCGAAATCCGCTAAGGAGTGTGT---  
>85\_34\_2s 1-68 -AAAGGG-TGTTGGTCGATTAATACAGCAGGACGGTGGTCATGGAAGTCGAAATCCGCTAAGGAGTGTGT---  
>85\_5\_4s 1-73 CAAAGGGGTGTTGGTCGATTAAGACAGCAGGACGGTGGTCATGGAAGTCGAAATCCGCTAAGGAGTGTGTAAAC

Matching from 675 to 749:

>85\_95\_5\_3s 1-73 ATGTGTGCGAGTTAACGGGCGAGTAAACCCGTAAGGCGCAAGGAAGCTGACTGGTGGGATCCCTTTGTGGG-TT--  
>II\_85\_16\_F1\_3s 1-62 -----T-ACGGGCGAGTAAACCCGTAAGGCGCAAGGAAGCTGACTGGTGGGTCCTTTGTGGG-TTGC-  
>II-85-33\_F10\_3s 1-64 -----AACGGGCGAGTTAAACCCGTAAGGCGCAAGGAAGCTGACTGGTGGGATCCCTTTGTGGGTTGGC

Matching from 805 to 885:

>II-42-13\_A6\_2s 1-41 ACCCGAAAGATGGTGAACCTATGCCTGAGCGGGGGCAAGCCA-----  
>85\_5\_3s 1-70 -----GGTGAACCTATGCCTGAGCGGGGGCAAGCCAAGGAAACTCTGGTGGAGGCCCGCAGCGATACTGACGTGC  
>85\_27\_2s 1-61 -----TGCTGAGCGGGGGCAAGCCAAGGAAACTCTGGTGGAGGCCCGCAGCGATACTGACGTGC  
>85\_30\_2s reverse 1-57 -----ATGCCTGAGCGGGGGCAAGCCAAGGAAACTCTGGTGGAGGCCCGCAGCGATACTGACGTGC  
>85\_19\_4s 1-58 -----TGCTGAGCGGG-GAAGCCAGAGGAAACTCTGGTGGAGGCCCGCAGCGATACTGACGT-  
>42\_1\_2s 1-43 -----GAGCGGGGGCAAGCCAGGGAAACTCTGGTGGAGGCCCGCAGC-----

Matching from 968 to 1029:

>II\_85\_44\_II\_2S reverse 1-63 GATAGCTGGAGCCCGCTGCGAGTTTATCGGGTAAAGCCAATGATTAGAGGCATCGGGGGCA

Matching from 1150 to 1206:

>II\_42\_97\_D11\_2s 1-54 ACGGCATGAACCGGAAGCCGGTTACGAGACCTAACTACGC-CT-----(GTCGGCTCAAT)

Matching from 1383 to 1451:

>85\_36\_4s 1-68 GCGGTGGTCGCTGCAAAACCTTTGGGC-CAGCCCGGGCGGAGCGGCCATCGGTGCAGATCTTGGTGGT-  
>85\_45\_1s 1-68 GCGGTGGTCGCTGCAAAACCTTTGGGC-CAGCCCGGGCGGAGCGGCCATCGGTGCAGATCTTGGTGGT-  
>85\_50\_3s 1-68 GCGGTGGTCGCTGCAAAACCTTTGGGC-CAGCCCGGGCGGAGCGGCCATCGGTGCAGATCTTGGTGGT-  
>85\_13\_2s 1-67 -CGGTGGTCGCTGCAAAACCTTTGGGC-CAGCCCGGGCGGAGCGGCCATCGGTGCAGATCTTGGTGGT-  
>85\_7\_1s 1-68 GCGGTGGTCGCTGCAAAACCTTTGGGC-CAGCCCGGGCGGAGCGGCCATCGGTGCAGATCTTGGTGGT-  
>II\_42\_11\_A4\_2s 1-40 -----AAACCTTTGGGC-CAGCCCGGGCGGAGCGGCCATCGGTG-  
>85\_5\_1s 1-69 GCGGTGGTCGCTGCAAAACCTTTGGGC-CAGCCCGGGCGGAGCGGCCATCGGTGCAGATCTTGGTGGT  
>42up2\_1s 1-41 -----AAACCTTTGGGC-CAGCCCGGGCGGAGCGGCCATCGGTGC-----

Matching from 1688 to 1736:

>II\_42\_84\_D5\_1s 1-45 CTGTTTAAACAGCCTGCCACCC----- (GTTGGGCGGTACAAATAGGGT)  
>II-42-83\_II\_4S 1-45 CTGTTTAAACAGCCTGCCACCC----- (GTTGGGCGGTACAAATAGGGT)  
>II-42-85\_D6\_1s 1-45 CTGTTTAAACAGCCTGCCACCC----- (GTTGGGCGGTACAAATAGGGT)  
>II-42-84\_II\_4S 1-45 CTGTTTAAACAGCCTGCCACCC----- (GTTGGGCGGTACAAATAGGGT)  
>II-42-18\_II\_4s 1-45 CTGTTTAAACAGCCTGCCACCC----- (GTTGGGCGGTACAAATAGGGT)  
>II-42-42\_II\_4S 1-45 CTGTTTAAACAGCCTGCCACCC----- (GTTGGGCGGTACAAATAGGGT)  
>II\_85\_5\_E5\_1s 1-45 CTGTTTAAACAGCCTGCCACCC----- (GTTGGGCGGTACAAATAGGGT)  
>II-42-18\_A8\_1s 1-45 CTGTTTAAACAGCCTGCCACCC----- (GTTGGGCGGTACAAATAGGGT)  
>II-42-42\_B8\_1s 1-45 CTGTTTAAACAGCCTGCCACCC----- (GTTGGGCGGTACAAATAGGGT)  
>II\_42\_83\_D4\_1s 1-45 CTGTTTAAACAGCCTGCCACCC----- (GTTGGGCGGTACAAATAGGGT)  
>II-42-85\_II\_4S 1-45 CTGTTTAAACAGCCTGCCACCC----- (GTTGGGCGGTACAAATAGGGT)

Matching from 1739 to 1887:

>II\_42\_99\_D12\_1s 1-44 AGCGGCTGGAAGGATCGCACGTCCGCGCGGTGTCCGGTGCGCC-----  
>II\_42\_76\_D2\_1s 1-44 AGCGGCTGGAAGGATCGCACGTCCGCGCGGTGTCCGGTGCGCC-----  
>II\_42\_19\_II\_1s 1-24 -----ATGCGACGTCGCGTGGTGTCCGGG-----  
>85\_12\_1s 1-48 -----ATGCGACGTCGCGTGGTGTCCGGTGCGCCCCCGG-CGG-CCCTTGAAAAAT-----  
>85\_36\_3s 1-48 -----ATGCGACGTCGCGTGGTGTCCGGTGCGCCCCCGG-CGG-CCCTTGAAAAAT-----  
>85\_16\_3s 1-48 -----ATGCGACGTCGCGTGGTGTCCGGTGCGCCCCCGG-CGG-CCCTTGAAAAAT-----  
>85\_14\_1s 1-48 -----ATGCGACGTCGCGTGGTGTCCGGTGCGCCCCCGG-CGG-CCCTTGAAAAAT-----  
>I\_85\_60\_H8\_2S 1-48 -----ATGCGACGTCGCGTGGTGTCCGGTGCGCCCCCGG-CGG-CCCTTGAAAAAT-----  
>I\_85\_60\_II\_1S 1-48 -----ATGCGACGTCGCGTGGTGTCCGGTGCGCCCCCGG-CGG-CCCTTGAAAAAT-----  
>85\_36\_1s 1-48 -----ATGCGACGTCGCGTGGTGTCCGGTGCGCCCCCGG-CGG-CCCTTGAAAAAT-----  
>I\_85\_60\_II\_4S 1-48 -----ATGCGACGTCGCGTGGTGTCCGGTGCGCCCCCGG-CGG-CCCTTGAAAAAT-----  
>II\_42\_100\_E1\_2s 1-30 -----TCGGTGGGCCCCCGG-CGG-CCCTTGAAAAAT-----  
>85\_18\_2s 1-59 -----CGTGGTGTCCGGTGCGCCCCCGG-CGG-CCCTTGAAAAATCTGGAGACCGAGTGCCTCC-----  
>85\_18\_1s 1-55 -----ATCGCGTGGTGTCCGGTGCGCCCCCGG-CGG-CCCTTGAAAAATCTGGAGACCGAGT-----  
>II\_42\_63\_C7\_2s 1-48 -----G-TGTTGTC-ACC-AG-CGG-CCCTTGAAAAAT-C-TAG-CGG-ATCAG-----  
>85\_2\_3s 1-75 -----CGACCGCTC-AGCGCGGTGGTCCATACCCGTTC-AGTCTCCAAGCCGGACAGCCTCTGCTGATGGAAC-----  
>42\_38\_1s 1-45 -----AACCGCATCAGGTCCTCCAAGGTGACACGCTCTGCTGATGGAAC-----

Matching from 1990 to 2075:

>I\_42\_93\_D8\_2s 1-39
>II-42-91\_D7\_2s 1-39
>42\_21\_1s 1-42
>II-42-91\_D7\_1s 1-43
>42\_31\_3s 1-42
>II\_42\_93\_D8\_-IS 1-43
>42up4\_4s 1-43

Matching from 2269 to 2309:

>II\_42UP\_41\_H3\_1s 1-41
>42up4\_1s 1-41

Matching from 2460 to 2500:

>85\_18\_3s 1-69
>42\_18\_1s 1-39
>42\_23\_1s 1-39
>42\_24\_1s 1-39
>42\_28\_3s 1-39
>42\_8\_1s 1-38
>42\_27\_1s 1-38
>42\_31\_1s 1-38
>42\_3\_1s 1-38
>42\_20\_3s 1-38
>II\_42\_64\_C8\_2s 1-37
>II\_42\_32\_A12\_2s 1-37
>II\_42\_37\_B4\_3s 1-38

Matching from 2573 to 2686:

>42up2\_3s 1-43
>II\_85\_11\_E8\_2s 1-72
>II\_85\_12\_E9\_2s 1-71
>II\_85\_11\_II\_1s 1-72
>II\_85\_12\_1s 1-72
>II\_85\_12\_3s 1-72
>II\_85\_11\_II\_3s 1-91
>85\_16\_1s 1-75

Matching from 2695 to 2769:

>85\_95\_4\_1s 1-75

Matching from 3221 to 3295:

>II\_85\_45\_G7\_1s 1-75

Matching from 3344 to 3389:

>II\_427\_A2\_2s 1-46
>42\_10\_2s 1-46
>42up\_1\_4 1-46
>42up\_3\_4s 1-46
>42UP\_8\_2s 1-46
>42\_37\_2s 1-46
>42up\_8\_4s 1-46
>II\_42\_51\_B12\_2s 1-45
>II\_4237\_B4\_2s 1-44
>42\_6\_1s 1-44
>4231\_4s 1-44
>42up\_2\_5s 1-44
>42\_26\_1s 1-44
>42\_33\_2s 1-44
>42\_21\_3s 1-45
>II\_427\_A2\_3s 1-44
>II\_426\_a1\_1s 1-31
>42\_24\_3s 1-47
>42\_38\_2s 1-46
>42\_9\_3s 1-43
>42\_23\_3s 1-52





### U3 snRNA

```
>II_42_30_A10_2S 1-42 GCTGCTGTGCGACTAGAGCGTGACTAACGGCTAATGGGCTTT
>II_42_83_II_2S 1-40 GCTGCTGTGCGACTAGAGCGTGACTAACGGCTAATGGGCT--
>II_42_84_II_2S 1-40 GCTGCTGTGCGACTAGAGCGTGACTAACGGCTAATGGGCT--
>II_42_85_II_2S 1-40 GCTGCTGTGCGACTAGAGCGTGACTAACGGCTAATGGGCT--
>II_42_18_II_2S 1-40 GCTGCTGTGCGACTAGAGCGTGACTAACGGCTAATGGGCT--
>II_42_42_II_2S 1-40 GCTGCTGTGCGACTAGAGCGTGACTAACGGCTAATGGGCT--
```

Reference sequence: *A. thaliana* U3 small nucleolar RNA (TAIR accession number AT5G54075) (361 bases)

```
CATAAGCTTATGATTCTTTTTTCTTACGAATTTTTCGCTCCACATCGGTAAGCGAGTGAAGAAATAACTGCTTTATATATATGGCTACAAAGCACCATTGGTCACGACCTTACTTGAACAGGATCTGTTCTATAGGCTCGTACCTCTGTTTCCTTGATTTCTCAAGAGACAGGCCCTTAACCCCTGGTGTATGAACCATGACC
GTGCGGCTAGAGCGTGATTGACGGCTACGATCGTCCCTCGGACGCATCCGGTGTGTAGAGGATCGTTACTCGGCTCGGTTCTACCTTGCCGGGGTGGTCGCACGGCGTCTGACAGGTTCTTTATTTTTTACCCTCAAAACTTTGAATGAATTTCTTC
```

### U4 snRNA

```
>II_42-30_A10_3S 1-45 -----GGCCTTCGAGAATTTCTGGAAGGGCTCCCTTCGGG-TAAAGCCCTA
>42_32_2s 1-46 -----GGCCTTCGAGAATTTCTGGAAGGGCTCCCTTCGGGTAAGCCCTA
>42up3_2s 1-52 GCCCAGGCCTTCGAGAATTTCTGGAAGGGCTCCCTTCGGGTAAGCCCTA
>42_1_3s 1-52 GCCCAGGCCTTCGAGAATTTCTGGAAGGGCTCCCTTCGGGTAAGCCCTA
>42up1_2s 1-52 GCCCAGGCCTTCGAGAATTTCTGGAAGGGCTCCCTTCGGGTAAGCCCTA
>II_42-61_C6_2s 1-52 GCCCAGGCCTTCGAGAATTTCTGGAAGGGCTCCCTTCGGGTAAGCCCTA
>42up1_3s 1-52 TGCCAGGCCTTCGAGAATTTCTGGAAGGGCTCCCTTCGGGTAAGCCCTA
>42up3_3s 1-52 TGCCAGGCCTTCGAGAATTTCTGGAAGGGCTCCCTTCGGGTAAGCCCTA
```

Reference sequence: *Arabidopsis thaliana* U4.2 small nuclear RNA (TAIR accession number AT3G06900)

```
TTCCCTCGCAAGTGATCGAAAGACCCCTGGATCTTCAGTAACTACAAGCTACAGAGTTATATATGTGAACGAATCTTGTCTGCTTTCAGATTTAAAGTTGTATTGAGAAAAGAGAGTTGCCGTCTTCTGGTAGAGACTTGGAGAAGAAGAGAGTCTGTTCAATTCATCTAGCGAATAGGTTCTTCTAGAATAATATAA
CTAGAGGGAGTCCACATCGAAAAGAAATGTAGATGGTTGGTTTTGTTTCGGGTATAAATAAAGAGGGTTTAGTTCGGTTGAAAGTCATCTTTGCGCTTGGGGCAATGACGCAGCTAATGAGGTAATAACCGAGGCGCGTCTATTGCTGGTTGAAAACATATTTCCAAACCCCTCCTGGCCCTAAGCTTGTCTTGGGCCCT
TCGAGAATTTCTGGAAGGGCTCCCTTTGGGTAAGCCCTACAATAACTAGTCTAAATGTTTTTCGAGTTTTGAAATTTAGAAAATCAAAATATCATGAAAATATATACACAATCTAGGCCAAGAAAACATCACTTGTCTGATGATAGGCCTGATAGTGAATAATGAA
```

### snR8b

```
>II_42UP_20_H2_1s 1-44 GCCATGGCATGACAGACA-CCCTACCCCATAGAATATGAGCAAC
```

*Arabidopsis thaliana* partial small nucleolar RNA snoR8b (snoR8b gene), clone Ath-55, 5' end incomplete; AJ505629  
CGGACGCGGTGGGAAAAGTAATTCCTCGTACTGAATGCTCATAAGGCATGATAGACTTACATTAACCCATAGAATATGAGCAT

### Sequence of fragments corresponding to transfer RNAs (n=151):

Blue: anticodon; orange: post-transcriptional 3' added -CCA bases; other colored sequences: identical; red: mismatch.

```
>tRNA-Asp (anticodon:GTC) (TAIR accession number: AT5G40545); n=57:
reference 1-72 GTCGTTGATAGTATAGTGGTAAGTATTCCTGTCACGCGGGTGACCCGGGTT-CGATCCCCGGCAACGG-CG
>II_42_7_A2_1s 1-42 -----GTCACGCGGGTGACCCGGGTT-CGATCCCCGGCAACGG-CGCCA-
>42_13_1s 1-42 -----GTCACGCGGGTGACCCGGGTT-CGATCCCCGGCAACGG-CGCCA-
>42up6_4s 1-42 -----GTCACGCGGGTGACCCGGGTT-CGATCCCCGGCAACGG-CGCCA-
>II_42_36_B3_1s 1-42 -----GTCACGCGGGTGACCCGGGTT-CGATCCCCGGCAACGG-CGCCA-
>42_34_1s 1-42 -----GTCACGCGGGTGACCCGGGTT-CGATCCCCGGCAACGG-CGCCA-
>42up2_4s 1-41 -----TCACGCGGGTGACCCGGGTT-CGATCCCCGGCAACGG-CGCCA-
>II_42-72_C11_2s 1-41 -----GTCACGCGGTTGACCCGGGTT-CGATCCCCGGCAACGG-CCCA-
>42_11_3s 1-38 -----CGCGGGTGACCCGGGTT-CGATCCCCGGCAACGG-CGCCA-
>42_9_2s 1-38 -----CGCGGGTGACCCGGGTT-CGATCCCCGGCAACGG-CGCCA-
>42_29_3s 1-38 -----CGCGGGTGACCCGGGTT-CGATCCCCGGCAACGG-CGCCA-
>42_2_3s 1-38 -----ACGCGGGTGACCCGGGTT-CGATCCCCGGCAACGG-CGCC-
>II_42-95_D10_3s 1-40 -----ACGCGGGTGACCCGGGTT-CGATCCCCGGCAACGG-CGCCA-
>II_42_8_A3_1s 1-40 -----ACGCGGGTGACCCGGGTT-CGATCCCCGGCAACGG-CGCCA-
>II_42-38_II_1s 1-45 -----CCTGTCACGCGGGTGACCCGGGTT-CGTCCCCGGCAACGG-CGCCA-
>II_42-12_II_1s 1-45 -----CCTGTCACGCGGGTGACCCGGGTT-CGTCCCCGGCAACGG-CGCCA-
>II_42-68_C10_1s 1-42 -----GTCACGCGGCTGACCCGGGTT-CGTCCCCGGCAACGG-CGCCA-
>42up8_1s 1-42 -----GTCACGCGGGTGACCCGGGTT-CGTCCCCGGCAACGG-CGCCA-
>42_19_1s 1-42 -----GTCACGCGGGTGACCCGGGTT-CGTCCCCGGCAACGG-CGCCA-
>42_20_1s 1-42 -----GTCACGCGGGTGACCCAAATT-CGTCCCCGGCAACGG-CGCCA-
>II_42_54_C3_2s 1-40 -----ACGCGGGTGACCCGAGTT-CGTCCCCGGCAACGG-CGCCA-
>II_42_56_C4_3s 1-39 -----ACGCGGGTGACCCG-GTT-CGTCCCCGGCAACGG-CGCCA-
>I_42-UP-12_G12_1s 1-39 -----ACGCGGGTGACCCGGGTT-CGTCCCCGGCAACGG-CGCC-
>II_42_53_C2_3s 1-40 -----ACGCGGGTGACCCGGGTT-CGTCCCCGGCAACGG-CGCCA-
>I_42-UP-10_G11_3s 1-40 -----ACGCGGGTGACCCGGGTT-CGTCCCCGGCAACGG-CGCCA-
>42_30_1s 1-40 -----ACGCGGGTGACCCGGGTT-CGTCCCCGGCAACGG-CGCCA-
>II_42_57_C5_3s 1-40 -----ACGCGGGTGACCCGGGTT-CGTCCCCGGCAACGA-CGCCA-
>II_42-61_C6_1s 1-42 -----GTCACGCGGGTGACCCGGGTT-CGTCCCCGGCAACGG-CGCCA-
>42_17_2s 1-42 -----GTCACGCGGGTGACCCGGGTT-CGTCCCCGGCAACGG-CGCCA-
>42_2_1s 1-41 -----TCACGCGGGTGACCCGGGTT-CGTCCCCGGCAACGG-CGCCA-
>II_42_11_A4_1s 1-41 -----TCACGCGGGTGACCCGGGTT-CGTCCCCGGCAACGG-CGCCA-
>II_42_35_B2_1s 1-41 -----TCACGCGGGTGACCCGGGTT-CGTCCCCGGCAACGG-CGCCA-
>42_34_2s 1-41 -----TCACGCGGGTGACCCGGGTT-CGTCCCCGGCAACGG-CGCCA-
>42_26_3s 1-42 -----GTCACGCGGGTGACCCGGGTT-CGTCCCCGGCAACGG-CGCCA-
>II_42-94_D9_3s 1-41 -----ACGCGGGTGACCCGGGTT-CGTCCCCGGCAACGG-CGCCA-
>42_34_4s 1-39 -----ACGCGGGTGACCCGGGTT-CGTCCCCGGCAACGG-CGCCA-
>II_42-12_II_2s 1-42 -----GTCACGCGGGTGACCCGGGTT-CGTCCCCGGCAACGG-CGCCA-
>II_42-38_II_2s 1-42 -----GTCACGCGGGTGACCCGGGTT-CGTCCCCGGCAACGG-CGCCA-
>II_42_12_A5_2s 1-42 -----GTCACGCGGGTGACCCGGGTT-CGTCCCCGGCAACGG-CGCCA-
>II_42_38_B5_2s 1-42 -----GTCACGCGGGTGACCCGGGTT-CGTCCCCGGCAACGG-CGCCA-
>II_42-67_C9_2s 1-42 -----GTCACGCGGGTGACCCGGGTT-CGTCCCCGGCAACGG-CGCCA-
>II_42_83_D3_1s 1-38 -----GCGGGTGACCCGGGTT-CGTCCCCGGCAACGG-CGCCA-
>II_42_54_C3_1s 1-36 -----GCGGGTGACCCGGGTT-CGTCCCCGGCAACGG-CGCC-
>II_42_56_C4_1s 1-36 -----GCGGGTGACCCGGGTT-CGTCCCCGGCAACGG-CGCC-
>II_42_57_C5_1s 1-36 -----GCGGGTGACCCGGGTT-CGTCCCCGGCAACGG-CGCC-
>II_42-94_D9_1s 1-36 -----GCGGGTGACCCGGGTT-CGTCCCCGGCAACGG-CGCC-
>II_42-95_D10_1s 1-36 -----GCGGGTGACCCGGGTT-CGTCCCCGGCAACGG-CGCC-
>II_42_53_C2_1s 1-36 -----GCGGGTGACCCGGGTT-CGTCCCCGGCAACGG-CGCC-
>42_25_2s 1-40 -----ACGCGGGTGACCCGGGTT-CGTCCCCGGCAACGG-CGCCA-
>42_25_3s 1-40 -----ACGCGGGTGACCCGGGTT-CGTCCCCGGCAACGG-CGCCA-
>II_42-13_A6_3s 1-42 -----GTCACGCGGGTGACCCGGGTT-CGTCCCCGGCAACGG-CGCCA-
>II_42-51_B12_1s 1-41 -----TCACGCGGGTGACCCGGGTT-CGTCCCCGGCAACGG-CGCCA-
>42up8_3s 1-40 -----ACGCGGGTGACCCGGGTT-CGTCCCCGGCAACGG-CGCCA-
>42_17_1s 1-39 -----ACGCGGGAGACCCGGGTT-CGATCCCCGGCGGG-AGCCA-
>II_42_57_C5_4s 1-39 -----ACGCG-TTGACCCGG-TT-CGATCCCCGGCAACGGGGGAC-
>II_42_53_C2_4s 1-30 -----ACGCGGGAGACCCGG-TT-CGATCCCCGACA-----
>II_42-94_D9_4s 1-40 -----ACGCGGGCGCCCGGTT-CGACCCCGGCAACGG-CGCCA-
>II_42_38_B5_3s 1-47 -----CCTGTCACGCGGGTGACCCGGGTTTCGTCCCCGGCAACGGCGGCCA-
```

```
>tRNA-Lys (anticodon: CTT) (TAIR accession number: AT5G14035); n=45:
reference 1-73 GCCCGTCTAGCTCAGTCTGGTAGAGCGCAAGGCTCTTAACCTTGTGGTCTGTGGGTTTCGAGCCCCACGGTGGGGC
>II_42_35_B2_2s 1-41 -----TAACTTGTGGTCTGTGGGTTTCGAGCCCCACGGTGGGGC
>II_42_38_II_3s 1-41 -----TAACTTGTGGTCTGTGGGTTTCGAGCCCCACGGTGGGGC
>II_42_36_B3_2s 1-41 -----TAACTTGTGGTCTGTGGGTTTCGAGCCCCACGGTGGGGC
>II_42_12_A5_1s 1-41 -----TAACTTGTGGTCTGTGGGTTTCGAGCCCCACGGTGGGGC
>II_42_38_B5_1s 1-41 -----TAACTTGTGGTCTGTGGGTTTCGAGCCCCACGGTGGGGC
```

```

>II_42_67_C9_1s      1-41      -----TAACTTGTGGTCGTGGGTTTCGAGCCCCACGGTGGGCGCCA
>42_1_4s             1-41      -----TAACTTGTGGTCGTGGGTTTCGAGCCCCACGGTGGGCGCCA
>42_2_2s             1-41      -----TAACTTGTGGTCGTGGGTTTCGAGCCCCACGGTGGGCGCCA
>42_32_1s            1-41      -----TAACTTGTGGTCGTGGGTTTCGAGCCCCACGGTGGGCGCCA
>II_42_12_II_3s     1-40      -----AACCTTGTGGTCGTGGGTTTCGAGCCCCACGGTGGGCGCCA
>II_42_52_C1_1s     1-42      -----TTAACTTGTGGTCGTGGGTTTCGTCGCCACCGTGGGCGCCA
>II_42_41_B7_1s     1-43      -----TTAACTTGTGGTCGTGGGTTTCGTCGCCACCGTGGGCGCCA
>II_42_33_B1_3s     1-41      -----TAACTTGTGGTCGTGGGTTTCGTCGCCACCGTGGGCGCCA
>42_33_1s            1-41      -----TAACTTGTGGTCGTGGGTTTCGTCGCCACCGTGGGCGCCA
>42UP3_1s           1-41      -----TAACTTGTGGTCGTGGGTTTCGTCGCCACCGTGGGCGCCA
>42UP_1_1s          1-41      -----TAACTTGTGGTCGTGGGTTTCGTCGCCACCGTGGGCGCCA
>II_42_30_A10_1s   1-41      -----TAACTTGTGGTCGTGGGTTTCGTCGCCACCGTGGGCGCCA
>II_42_17_A7_1s    1-41      -----TAACTTGTGGTCGTGGGTTTCGTCGCCACCGTGGGCGCCA
>II_42_72_C11_1s   1-40      -----AACCTTGTGGTCGTGGGTTTCGTCGCCACCGTGGGCGCCA
>II_42_83_II_1s    1-40      -----AACCTTGTGGTCGTGGGTTTCGTCGCCACCGTGGGCGCCA
>II_42_84_II_1s    1-40      -----AACCTTGTGGTCGTGGGTTTCGTCGCCACCGTGGGCGCCA
>II_42_18_II_1s    1-40      -----AACCTTGTGGTCGTGGGTTTCGTCGCCACCGTGGGCGCCA
>II_42_42_II_1s    1-40      -----AACCTTGTGGTCGTGGGTTTCGTCGCCACCGTGGGCGCCA
>II_42_85_II_1s    1-39      -----AACCTTGTGGTCGTGGGTTTCGTCGCCACCGTGGGCGCCA
>42_27_3s           1-41      -----CAACTCGTGGTCGTGGGTTTCGTCGCCACCGTGGGCGCCA
>II_42_39_B6_1s    1-41      -----TAACTTGTGATCGTGGGTTTCGTCGCCACCGTGGGCGCCA
>II_42_84_D5_2s    1-38      -----CCTTGTGATCGTGGGTTTCGTCGCCACCGTGGGCGCCA
>II_42_85_D6_2s    1-42      -----TTAACTTGTGGTCGTGGTTTCGGGCCACCGTGGGCGCCA
>II_42_83_D4_2s    1-41      -----TTAACTTGTGTCGTGGGTTTCGGGCCACCGTGGGCGCCA
>II_42_83_II_3s    1-42      -----TTAACTTGTGGTCGTGGGTTTCGGGCCACCGTGGGCGCCA
>II_42_84_II_3s    1-42      -----TTAACTTGTGGTCGTGGGTTTCGGGCCACCGTGGGCGCCA
>II_42_85_II_3s    1-42      -----TTAACTTGTGGTCGTGGGTTTCGGGCCACCGTGGGCGCCA
>II_42_18_II_3s    1-42      -----TTAACTTGTGGTCGTGGGTTTCGGGCCACCGTGGGCGCCA
>II_42_42_II_3s    1-42      -----TTAACTTGTGGTCGTGGGTTTCGGGCCACCGTGGGCGCCA
>II_42_100_E1_1s   1-40      -----AACCTTGTGGTCGTGGGTTTCGGGCCACCGTGGGCGCCA
>II_42_45_B9_1s    1-40      -----AACCTTGTGGTCGTGGGTTTCGGGCCACCGTGGGCGCCA
>42_18_2s           1-41      -----TAACTTGTGGTCGTGGGTTTCGGGCCACCGTGGGCGCCA
>II_42_42_B8_2s    1-42      -----TTAACTTGTGTCGTGGGTTTCGGGCCACCGTGGGCGCC
>42_32_3s           1-40      -----TAACTTGTGGTCGTGGGTTTCGG-----CCCCACCGTGGGCGCG
>42_37_1s           1-41      -----TAACTTGTGGTCGTGGGTTTCGGGCCACCGTGGGCGCCA
>II_42_19_II_2S-AS 1-41      -----TAACTTGTGGTCGTGGGTTTCGAACCCACCGTGGGCGCCA
>II_42_19_A9_1s    1-41      -----TAACTTGTGGTCGTGGGTTTCGAACCCACCGTGGGCGCCA
>II_42_63_C7_1s    1-40      -----AACCTTGTGGTCGTGGGTTTCGGGGTACCGTTCGGGCGCCA
>II_42UP_20_H2_2s  1-46      -----TAACTTGTGGAACGGGGTTCGTCGCCACCTGGGGGCGCACTGCT
>II_42_45_B9_2S    1-41      -----TAT-CTTGTGGTCGTGGGTTTCGAGCACCCACCGTGGGCGCCA

```

```

>tRNA-Lys (anticodon: TTT) (TAIR accession number: AT5G48465) ; n=1:
reference      1-72      -GCCCTCTAGCTCAGTGGTAGAGCGCGTGGCTTTTAAACCACGTGGTCGTGGGTTTCGATCCCCACAGACGGC
>42UP6_1s      1-41      -----TAAACCACGTGGTCGTGGGTTTCGATCCCCACAGACGGC

```

```

>tRNA-Gly (anticodon: TCC) (TAIR accession number: AT5G59385) ; n=16:
reference      1-73      CCGTCGTAGTCCAACGGTTAGGATAATTGCCTTCCAAGCAATAGACCCGGGTTTCGACTCCCCGACAGCGCA
>II_42_52_C1_2s    1-40      CCGTTTGTAGTCCAACGGTTAGGATAATTGCCTTCCAAGC-----
>42_34_3s          1-40      CCGTTTGTAGTCCAACGGTTAGGATAATTGCCTTCCAAGC-----
>II_42-41_B7_2s    1-40      CCGTTTGTAGTCCAACGGTTAGGATAATTGCCTTCCAAGC-----
>42up4_2s         1-39      CCGTTTGTAGTCCAACGGTTAGGATAATTGCCTTCCAAG-----
>II_42-39_B6_2s    1-39      CCGTTTGTAGTCCAACGGTTAGGATAATTGCCTTCCAAG-----
>II_42-13_A6_1s    1-39      CCGTTTGTAGTCCAACGGTTAGGATAATTGCCTTCCAAG-----
>II_42UP_41_H3_2s  1-39      CCGTTTGTAGTCCAACGGTTAGGATAATTGCCTTCCAAG-----
>II_42-68_C10_2s   1-39      CCGTTTGTAGTCCAACGGTTAGGATAATTGCCTTCCAAG-----
>II_42_33_B1_2s    1-39      CCGTTTGTAGTCCAACGGTTAGGATAATTGCCTTCCAAG-----
>II_42-41_B7_3s    1-38      CCGTTTGTGA-TCCAACGGTTAGGATAATTGCCTTCCAAG-----
>42_28_1s         1-39      CCGTTTGTAGTCCAACGGTTAGGATAATTGCCTTCCAAG-----
>II_42_52_C1_3s    1-39      CCGTTTGTAGTCCAACGGTTAGGATAATTGCCTTCCAAG-----
>42_20_2s         1-38      CCGTTTGTAGTCCAACGGTTAGGATAATTGCCTTCCAAG-----
>42_26_2s         1-36      CCGTTTGTAGTCCAACGGTTAGGATAATTGCCTTCC-----
>42_6_2s          1-36      CCGTTTGTAGTCCAACGGTTAGGATAATTGCCTTCC-----
>42up5_1s         1-31      CCGTTTGTAGTCCAACGGTTAGGATAATTGC-----

```

```

>tRNA-Gly (anticodon: CCC) (TAIR accession number: AT5G53487) ; n=1:
reference      1-71      CGGCATCTGGTGTAGTGGTATCATAGTACCCCTCCACGGTACTGACCAGGGTTCGATTCCTGGATCGCGCA
>85_23_3s       1-60      -----AGTGGTATCATAGTACCCCTCCACGGTACTGACCAGGGTTCGATTCCTGGATCGCGCA

```

```

>tRNA-Gly (anticodon: GCC) (TAIR accession number: AT5G07135); n=1:
reference      1-71      GCACCAGTGTCTAGTGGTAGAATAGTACCCTGCCACGGTACAGACCCGGG-TTCGATTCCCGGC-TGGTGCA
>II_42-17_A7_2s      1-41      -----ACGGTACAGACCCGGGTTCGTTTCCCGGCCTGGTGCACCA

>tRNA-Met (anticodon: CAT) (TAIR accession number: AT5G67455); n=12:
reference      1-72      -----ATCAGAGTGGCGCAGCGGAAGCGTGGTGGGCCATAACCCACAGTCCAGGATCGAAACCTGGCTCTGATA
>42_22_1s      1-41      GAAAAAATCAGAGTTGGCGCAGCGGAAGCGTGGTGGGCC-----
>II_42_33_B1_1s      1-39      -CTGAAAATCAGAGTGGCGCAGCGGAAGCGTGGTGGGCC-----
>42_15_1s      1-45      -CTGAAAATCAGAGTCGCGCAGCGGAAGCGTGGTGGGCCATAACC-----
>42_3_2s      1-38      -CTGAAAATCAGAGT-GCGCAGCGGAAGCGTGGTGGCCT-----
>42_25_1s      1-32      -----ATCAGAGT-GCGCAGCGGAAGCGTGGTGGCCT-----
>42_35_1s      1-33      -----ATCAGAGTCGCGCAGCGGAAGCGTGGTGGCCT-----
>II_42_97_D11_1s      1-34      -----ATCAGAGTAGCGCAGCGGAAGCGTGGTGGCCT-----
>42_16_2s      1-32      -----ATCAGAGT-GCGCAGCGGAAGCGTGGTGGCCT-----
>42_7_3s      1-32      -----ATCAGAGT-GCGCAGCGGAAGCGTGGTGGCCT-----
>42_22_3s      1-33      -----ATCAGAGTGGCGCAGCGGAAGCGTGGTGGCCT-----
>42_1_s      1-34      -----ATCAGAGTTGCGCAGCGGAAGCGTGGTGGCCTT-----
>42_15_2s      1-33      -----ATCAGAGT-GCGCAGCGGAAGCGTGGTGGCCTT-----

>tRNA-Glu (anticodon: CTC) (TAIR accession number: AT5G09755); n=6:
reference      1-73      TCCGTTGTAGTCTAGCTGGTCAGGATACTCGGCTCTCACCCGAGAGACCCGGGTCGAGTCCCGGCAACGGAG
>II-85-15_E12_1s      1-60      -----FGGTCAGGATATTCGGCTCTCACCCGAAAGACCCGGGTTCAAGTCCCGCAACGGAAACCA
>II_85_18_F2_1as      1-59      -----FGGTCAGGATATTCGGCTCTCACCCGAAAGACCCGGGTTCATGTCCCCGCAACGGAAACC-
>II_85_19_F3_1s      1-59      -----FGGTCAGGATATTCGGCTCTCACCCGAAAGACCCGGGTTCATGTCCCCGCAACGGAAACC-
>85_50_1s      1-60      -----FGGTCAGGATATTCGGCTCTCACCCGAAAGACCCGGGTTCAAATCCCGCAACGGAAACCA
>II-85-38_II_1s      1-58      -----FGGTCAGGATATTCGGCTCTCACCCGAAAGACCCGGGTTCAAATCCCGCAACGGAAACC-
>II_85_38_G1_1s      1-60      -----FGGTTAGGATACTCGGCTCTCACCCGAGAGACCCGATTCAATCCCGCAACGGAAACCA

>tRNA-Ser (anticodon: GCT) (TAIR accession number: AT5G06685); n=2:
reference      1-82      GTCGGCTTGGCCGAGTGGTTAAGCGGTTGCCTGCTAAGTAAATGGGGTTTCCCGCGAGAGTTCGAATCTCTCAGGCGAGC
>I-42-UP-10_G11_1s      1-42      -----TGGGGTTTCCCGCGAGAGTTCGAATCTCTCAGGCGAGCCA
>II_42UP_17      1-47      -----TGATGTTCCCAAGCGAGACTTCGAATCTCTCAGGCGAGCCCCCTGTC

>tRNA-Ser (anticodon: AGA) (TAIR accession number: AT3G46875); n=2:
reference      1-82      GTGGCGGTGCCGGAGTGGTTATCGGGCATGACTAGANAATCATGTGGGCTTTGCCCGCGAGGTTCGAATCCTGCCGCTCAGC
>II-42-48_B10_1S      1-37      GTGGCGGTGCCGGAGTGGTTATCGGACATGATCGGANA-----
>II-42-61_C6_3s      1-39      GTGGCGGTGCCGGAGCGGTTATCGAANAATGATTTGANAAT-----

>tRNA-Ser (anticodon: TGA) (TAIR accession number: AT5G52355); n=1:
reference      1-82      GTCGATATGCCAGTGGTTAAGGAGACAGACTTGAAATCTGTTGGGCTTCGCCCGCGCAGGTTCGAACCCCTGCTGTCGACG
>I-42-UP-10_G11_2s      1-42      -----TGGGCTTCGCCCGCGCAGGTTCGAACCCCTGCTGTCGACGCCA

>tRNA-Pro (anticodon: AGG) (TAIR accession number: AT5G39535); n=4:
reference      1-73      GGGCATTGGTCTAGTGGTATGATTCTCGCTTAGGGTCGAGAGGTTCCCGAGTTCAAATTCGGAATGCCCC
II_42_76_D2_2s      38      -----GCGAGAGGTCCCGAGTTCGCTTCTCGGAACGCCCCCCCA
42_22_2s      41      -----GCTGCGAGAGGTCCCGAGTTCGATTCTCGAACGCCCCCCCA
II-42-68_C10_3s      41      -----GCTGCGAGAGGCCCGAGTTCGATTCTGGGAATGCCCCCCAA
II_42_8_A3_2s      41      -----GCTGCGAGAGTTCCCGAGTTCATTCTCGGAATGCCCCCCCA

>tRNA-Arg (anticodon: TCG) (TAIR accession number: AT5G02615); n=2:
reference      1-75      GACCCGATAGCGCAGTGGATTAGCGGTTTGACTTCGGATCAAAAAGGTCGTGGGTTCGACTCCCACTGTGGTCG
>II-42-19_II_1S      1-41      -----GGATCAAAAAGTTCGTGGGTTCGACTCCCACTGTGGTCGCCA
>II-42-19_A9_2S      1-41      -----GGATCAAAAAGTTCGTGGGTTCGACTCCCACTGTGGTCGCCA

>tRNA-Arg (anticodon: ACG) (TAIR accession number: AT5G65015); n=1:
reference      1-74      GACTCCGTGGCCCAATGGATAAGGCGTGGTCTACGAAAACCAGAGATCTGGGTTCGATCCCCAGCGGAGTCG
>II_42_37_B4_1s      1-48      -----CCTGAAGGAAAACCAGAGATCTGGGTTCGATCCCCAGCGGAGTCGCCA

```

Sequence of fragments corresponding to chloroplastic, mitochondrial & bacterial RNA (n=19):

Colored: identical; red: mismatch.

chloroplastic RNA (n=6):

chloroplastic tRNA: Reference sequence: Chlamydomonas reinhardtii tRNA-Glu (trnE1; anticodon TTC); GB accession number: BK000554 (REGION: 14463-14535)

Reference 1-73 GCCCCATCGCTAGAGGCCCTAGGACACCTCCCTTTCACGGAGAAAACGGCGGATTCGAATTCGCGTGGGGGTA
>85\_34\_1s 1-62 -----AGAGGCCAGGACACCGCCCTTCACGGCGGTAAAGGGGTTTTCGAATCCCTAGGGAGC-CC

chloroplastic tRNA: Reference sequence: Chlamydomonas reinhardtii tRNA-Asp (trnD; anticodon GTC); GB accession number: L26265

Reference 1-74 GGGATTGTAGTTCAATTGGTTAGAGCACCGCCCTGTCACGGCGGAAGTTCGGGGTTCGAGTCCCGTCAATCCCG
>85\_41\_1s 1-56 -----ACGCGGGGGTTCGGGGTTCGAGTCCCGTCCACTCCGCCA-AAATTGCGCGCTGGT

chloroplastic protein coding RNA:

>II\_85\_11\_E8\_1s REVERSE 1-60 TAGATATTGATGGTATTTCGTGAACCTGTTCTGGATCTCTTCTTTACGGAAACAATATTA
>II\_85\_11\_Ii\_4s REVERSE 1-60 TAGATATTGATGGTATTTCGTGAACCTGTTCTGGATCTCTTCTTTACGGAAACAATATTA
>II\_85\_12\_4s REVERSE 1-60 TAGATATTGATGGTATTTCGTGAACCTGTTCTGGATCTCTTCTTTACGGAAACAATATTA
>II\_85\_12\_E9\_1s REVERSE 1-49 -----GGTATTTCGTGAACCTGTTCTGGATCTCTTCTTTACGGAAACAATATTA

Arabidopsis thaliana chloroplast psbA ORF (X79898; TAIR accession number ATCG00020); 1062 bases
Matching from 173 to 232

ATGACTGCAATTTTAGAGAGACGCGAAAGCGAAAGCCCTATGGGTCGCTTCTGTAACCTGGATAACTAGCACTGAAAACCGCTCTTTACATTTGGATGGTTTGGTGTGTTTGGATGATCCCTACCTTATTGACCGCAACTCTGTGTTTTATATCGCATTCATGCTGCTCCAGTAGATATGATGGTATTCGTGAACCTGTT
TCTGGATCTCTTCTTTACGGAAACAATATTTCCCGGTGCCATTTCTCTACTTCTGCACTGATTTGGATGGATTTTACCAATTCGGGAAGCTGCATCCGTTGATGAAATGGCTATACAACGGCGGCTCTTATGAACATAATTTGCTACACTTTTACTTGGTGTAGCTTGTATATGGGTCGTGAGTGGGAACCTTAGT
TTCGGTCTGGGTATGCGTCCCTGGATTGCTGTTCATATTCAGCTCCCTGTCAGCTGCACTGCTGTTTCTTGATCTATCCAATTTGGTCAGGGAAGTTTTCTGATGATGCTCTAGGAATCTCTGGTACTTTCAACTTTATGATTTATCCAGGCTGAGCAACAATCTTATGACCACTTTCACATGTTAGGT
GTAGCTGGTGTATTCGGCGGCTCCCTTTTAGTGTATGCAATGGTCTTGGTAACTCTAGTTTGTACAGGAAACACAGAAAATGAATCTGCTAATGAAGTTACAGATTCGGGCAAGAAAGAAACTTACACATTTGATGCTGCTACCGGTTATTTGGCCGATGATTTTCCAAATGCTAGTTTCAACATTTCT
CGTCTTTACATTTCTTCTAGCCGCTTGGCCGATAGTATTTGGTTACTGTTTAGTATTAGTACTATGCTTCAACCTAAATGGTTTCAATTTCAACCAATCCGTAGTTGATAGTCAAGGACGTGTTATTAATCTTGGGCTGATATTTAACCCTGCTAACCTTGGTATGGAAGTTATGATGAACCTGTAAT
GCTCACAACTTCCCTAGACCTAGCTGCTGTTGAGGCTCCACTTCAAAATGGATAA

mitochondrial 26S rRNA (rrn26; n=4):

Matching from 1971 to 2029

>II\_85\_40\_G2\_2s 1-66 CTCTCGGTCGTAGTTTGGCGACCTATCTTCAGTAGGGGCTTTATTCITTTTGATTAGAG---(AAAAAAA)
>II\_85\_41\_G3\_2s 1-66 CTCTCGGTCGTAGTTTGGCGACCTATCTTCAGTAGGGGCTTTATTCITTTTGATTAGAG---(AAAAAAA)
>II\_85\_8\_E7\_2s 1-66 CTCTCGGTCGTAGTTTGGCGACCTATCTTCAGTAGGGGCTTTATTCITTTTGATTAGAG---(AAAAAAA)

Matching from 2108 to 2149

>42\_16\_1s 1-42 AACAAGG-TGGAACTCCAGGAAAAAACCCTCGAATTGGGAGG

Nicotiana tabacum mitochondrial 26SrRNA (BA000042); 3406 bases

GGGTACAAGATCGAAAGAAATGCATTGGATGGATGCCGGGGCATTGAGAAGGAAGGACGCTTTCAGAGGGGAAAGGCCATGGGGAGATACCCTGTGTATCCATGGATCCGATCGGGAACCCGATATCCAAGCTCCGTTGGCTAGTCTGGCGCTCTTTGGACTTTTCAAACCTAGCGAAGTAAACACTTCTAGTAGCTAAAG
GAAGGAAATCAACCGAGACCCCGTTAGTAGCGCGGAGCGAGAGCGGATTTGGGGTTTGAAGAAAACAACACAGAACTCTGTTCCCTCAGCAAAGTGTTCACCTCTTTTTCGCCAGGTTTCATTCGATTTGTTGGATTGGATGATGAAAACCGCAAGCTACGGCTTCAAAGCTTACCTTATTTAGAAAAGGAGAA
AGGGCTTTTTATAGATGTTGAGGTTGAGTAGGGGGCGGAGCTTGAAGAGCGAAGCGGCGCTAGCCTAGCAACGCTTTTTCAGCAGCAAGCTACGGTCAACGACCCCTAACCTAGGTTGGGGCGAAAACCTCCAAAATCCAAAACGTTGGTTAGGTTCCAAAACCTTTCTCTAATAAAGGTAAGCTTTCAAGC
CGCCGCCCTTTAAAGGACCGGGCGAAGTGAACCTGTAATTTGAAAAGATGGAAGATCTGGCCAAAGAAAGGTGATAGCCCTGTAGATTGCTTCCCATGGTTCCGATCCTCCCAATAAAACGGCGGTTCGAATTTCTGATCGCTTTTACGGGAAAGGGGGACCCCTCTAAGCCTAAGTATTCCTCAATGACCGATA
CGGTACAAGTACCGTGAGGAAAGGTGAAAAGAACCTTATTAGGAGTGAATAGAGAACTGAGATCCGATCGCAACAATCAGTCGAAGGAGCGGAGCTTAGAGCCTTTACTTTATGTAAGCGCACTCACTCTAACCGGCTACCTTTTGCATGATGGGTGAGCGAAGAAATGGGAACAGCGGCTTAAGCCATTAGGTG
TAGGCGCTTCCAGAGGTGGAATCTTCTAGTTCTTCCATTTGACCGAAACCCGATCGATCTAGCCATGAGCAGGTTGAAGAGAGCTCTAACAGGCCCTTGGAGGACGAACCCACGATGTGGCAAATACGGGGATGACTTGTGGCTAGGGGTGAAAGGCCAACCAAGATCGGATATAGCTGGTTTTCCGCGAAATCTAT
TTCAGTAGACGATGATGTCGATGGCCGAGGTAGAGCACTCAATGGGCTAGGTTGCCCTTATTCGCCTTACCAACCCAGGGAACTCCGAATACAGGCCATAGATCGTTTGTACAGACAGACTTTTGGGTGCTAAGATCCAAAGTGCAGAGGAAACAGCCAGATCGTACGCTAAGTCCCTAAGCAATCACTTAG
TGGAAAAGGAAGTGTATCGAGCATGACAAACAGGAGGTGGCTTGGAAAGCAGCCATCTTTGAAGAAAGCATAATAGCTACTGGTCTAGCTCCATGGCACCCGAAATGTATCAGGGCTCAAGTATTACCGAAGCAGCAGACCTTGAAGCTGCTTTTCAAGTGTCAAGTAGCGAAAGTCTGTCAATCGGGGAAGG
TTTTTGTGACAAAGCTGGAGATATCAGAAGTGAATGTCGACATGAGTAAACAAAATCTGTGAAAACACGATCGCCTGCCAGTGGAAAGTTTCTGCGTTCAGTCAATCTACGCAAGTGAATCGTCCCTAAGGAACCCCGAAAGGGCTGCCGCTCCAGTGGGTACACGAAAGTGCAGAGTTGCTTTGACTAC
AGAACCATGCTTGTGTTGGAGCGAATGGATGATCGGGCCGAGGGCTGCCCTTCTCCCTCACTCTCCTTTCCCTAATATGAACCTTGAAGTCAATCAAAAGCTTCTGACTCGGCTGGCCGGTCCCTACGCGACTGGCGCTTCAAAGGCGAAACTCTCGTGTGCTAGTTTGGCGACTATCTTCAGTAGGGGGC
TTTAGTCTTTTGGATTAGTAGAGGGTTCGCGAGAGCAGAGCGTACCCTGCCCTGCCATAGTCAAGGCTGTTTATAGTCCGACTGTTGTATAGTCAACAAGGTTGAAACTTCAGGAAAAAACCTCGAATTTGGAGGGCGGATCCTCCCGTGAACCTGACCGTACCCTAACCCAGCAGCTGAACTAGAGTATAT
AGGGCTTGAAGAACCATGTCGAAGAACTCCGCAAAATGACCCGTAACCTTCGGGAGAAAGGGTGTCTCTATCTTTTGGATTAGAAAGCGCACATACAGGGGTTAGCGACTTTTATTAATAAACACAGGACTCTGCTAAGTGGTAAACAGATGATAGAGTGTGACACTGACCGTGTGGAGGTCGGAAAG
AGAAGCTTTAAGCTTTGAATGAAGCCCGGTAACCGGCGCAGTAACTTAACTGTCCTAAGTAGGCAAAATCTCTGTCATAGTAAAGTGGTAAACGACTGCCCCCTGCTCCGATGAGACCGGTAAGTAACTCCGTTAGAGTGCAGGATACCAACGCTAGACGTTAGACCC
CGTGCACCTTAACATAGCTTGCAGTGAACAACCTTAATCGAATGTTAGGATAGTGGAGGTTGGTGACACAAACGCAACCTTCTGCTCAAGGATGCTTTCGCTAAGGATGCTTAAACCGCCGACCGATATTCGGGGGGAGGCGGACACTGCGAGGTGGTATTTATCTGGGGCGGATGCTTCTAAGAGTAAAC
GGAGGTGGGAAAGTAGCTCAAGCTAAGATTTCTGCTGAGCGTAAATGATTAAGCTGCTGACTGTGAGACCGACTGTCGAACAGAGACGAAAGTGGCCCTAGTGTATCGGGAGTCCCGTGGGAAAGGCTCTGCTCAACGGATCAAGAGTACCGCGGGGTAACAGGCTGATGACTCCCAAGAGCTCTTATC
GACGAGTCCCTTGGCACTCGACTCCTCACACTCCTGGGTTGAAGAAGTCCCAAGGTTCCGTTGCTCCGCAATCAAGTGGTACGTTGGTGTGAAAGGAGAACTCGAGTGAAGTGAAGGAGGAGTGAAGCAGGAGTGAAGCGATCTGCTACTAACGAAAGACTT

**Bacteria-related (non-chloroplatic; n=9):**

Corresponding to *Janthinobacterium* sp. Marseille 5S ribosomal RNA (CP000269)  
>85\_18\_4s 1-73 ATCGAACAGGACCGTGAACGACTTTGGCGCC-ATGATAGTGTGCA-CCCGTGGAAAGT-TGTTATCGTCAGGCT

Corresponding to *Pectobacterium* sp. 16S ribosomal RNA (EU490611)  
>II\_42\_32\_A12\_1s 1-42 CCACGCCGTAACGATGTCGACTTGGAGGTTGTGCCCTTGAG  
>II\_42\_64\_C8\_1s 1-42 CCACGCCGTAACGATGTCGACTTGGAGGTTGTGCCCTTGAG

Corresponding to Uncultured bacterium clone B31\_52 16S ribosomal RNA (EU790472)  
>85\_23\_1s 1-61 CATCCACGGAAAGTTTTCAGAGATGAGAATGTGCCTTCGGGAACCGTGAGACAGGTGCTGCC

Corresponding to *Comamonas testosteroni* strain LMG1800 (Wheat associated bacterium) 23S ribosomal RNA gene (DQ150550)  
>II\_85\_44\_II\_3s 1-75 GTAACAGGTACTGGAGGTCGAACCCACTACTCTTGGCAAAAGTAGGGGATGAGCTGTGGATAGGGGTGAAAGGCT

>42up5\_2s 1-40 GGTAAAGCGACTAAGCGTACACGGTGGATGCCCTGGCAGT  
>II\_85\_4\_E4\_1s 1-61 AAGTTGCAGGGTATAGACCCGAAACCCGGTGTACTAGCCATGGCAGGTGAAGGTTGGGT

Corresponding to uncultured gamma proteobacterium clone 692 23S ribosomal RNA gene (EF188328)  
>85\_37\_1s 1-71 CCTGTACTTTGGTGTACTGCGAAGGGGG-GACGGAGAAGGCTATGTTGGCCGGCCGACGGTTGTCCCGGTTT  
>85\_40\_1s 1-65 -----CTTGGTGTACTGCGAAGGGGG-GACGGAGAAGGCTATGTTGGCCGGCCGACGGTTGTCCCGGTTT

**Sequence of fragments corresponding to mRNA and fragments ambiguous/not matching to know sequences:**

Colored sequences: identical; red: mismatch

**Protein coding mRNAs:**

>42\_11\_1s 1-23 -GGGGAATAACGAGAAGGCTGGCA  
>42\_29\_1s 1-23 -GGGGAATAACGAGAAGGCTGGCA

Some similarity to an *Arabidopsis thaliana* protein phosphatase 2C family protein (TAIR accession number AT5G06750) (orange ORF)  
CGATATGCACGAGACTCCACTGGGATCTCATAGTATCCAAGCTGATATGTATGATCCAAACAACCTTTGAAGTCAAGACCAAACTCATGATGTAGAACCTAATCAGTTTCCCATTAATTCATCAAGGGATCACCAGCAAGGAGCGTGATATTATCAAGCTCAAGCCGAGTTTGTGGCTGATTTTGGAAATGCCCTTTG  
GGCAGGATTTGGTGATGAAGAGTGTGTTTATGAAACCTGAGCTTGAGCGGTTGATCCTCTGTTAGGAGTTTCGAGAGAAAGAGGTTGATTTTCAGAGAGGCTTTAAGAGCTGCATTTTCTGCTACTGAGGAAGGGTTCTCAGCTTGTGCGAAGGACTTGGCGGTTGAAACCGTTGATGCAGCTGTGGATCTTGT  
GTTTGGTTGGAGTTATTTGGAAGGGACTTTGCTTATCGCTAATGTGGTGTATCTCTGTTGCTGCTTGGTTTCCATGGGTAGTAATAATAATAGGTCAAAACAAGATTGTAGCTGAGCAACTGACTAGTGATACAATGCTCTTTGGAAGAAGTTAGACAAGACTTAGGCTGTTGCATCCTGATGATTCACATATCGTTG  
TCCTTAAACATGTTGGTGGCGGCTCAAAAGGCTCATCTAGGATCTAGATCAATAGGGGATGCATATTTAAAGCCGCGCAGAGTCTCTACTTGACCCCTCATTTCCCGGGTTCCATCTCGCTGAAGAATCAAAAGACCTGTTTATCAGCAGAGGCTTGTGCTACACAGAGTCTTACAAACAAGTACAAAGTTTGTGA  
TATTCGATCAGATGGACTCTGGGAACAATGACCAACCGAGCAAGCTGTAGAGATAGTGAATAAACACCCCGCTCTGGAATAGCGAGAAGGCTGGTGAAGAAGCGATAAACATAGCTGGGAAAAGAGAGAGATGAATTACGATGATTTGAAGAAGTGGAGAGGAGTGGAGAGATCTTTTCATGATGATATAACAG  
TGGTGTGATATTATAGCAATGAGCTTCTATGTTGGAGAAAGCTACTGTTCCCTGAATGTGCCATTAAGGTTTTTCTCATACCGTGGACCTTCCAAAGTTCAGTATCTTCTCTTAGACATTTTGTGTACATTTCTTACTTACTATCACAGTCTTCAAAATATGATAAAATGAACACGGATCGATTTTGTAC  
CAACAGTTTGAAGTTAGATACAAAATTTAGGTTAAT

>42\_3\_3as 1-57 GGGAAAGCTGGGGTGGAGCAGGTAGCTTGAGAGAAAGTGGAGGTGCTCTGTAGGCC

Similar to *Arabidopsis thaliana* cDNA with unknown function (TAIR accession number AT2G26570):  
ATGAGGACTTAAAACTGTGAAGCATCTGATAAATGTTGTAGTATAATGTTGAGAAAGTCAATCTGAGTTGATTTCCACCATTCGAAATCTAACATACAATCTGCAACAAGGTTGATAATATCCACAATCTCAAATGACTGAAGAGACTCAACAATCTCAAATGATCTGAAGAGACTCAACAATCT  
CAAACTGATGACACTACCGGCAATGCGAAGATTTATGTCGATGACACGTTTTCCGCTTCTGATGCTGCAACCGCTGCGGTTTAAACCGGAAAAGATAGTAGCAGTACAACTTTAGAAAGAGTGAAGGCCAGATGAGATTTGGTTTACTAGTGTCAAGATTACCGAGGCTGCGACGGGTACAGCAAAAATGTTGGG  
GGGTCACTAGAATCTGATCATCTCTAGATTTTCAGGATCACCAGTGGAGCAACCGAAAAATGTGGACTCACATCAGGTTTAAATCGATACCGCAGCGCCATTTGAATCTGTTAAAGAGCTGTATCAAAATTTGGAGGATTTACTGACTGGAAGTCTCACCGAATGCAAGCGGTAGAGAGCAAGGCTTAT  
GAAGAAGGCTTAAAAAGATTCATGAGGAGATTCCTGAGTACAAAACACATTCAGAACTGCAGAGCTGCAAACTGCAAGTCTTAAAGAGCTGGAAGCACAAGAGACTTATAGAACAGTTGAGCTTAAATTTGGACAAGGCAAAAAGAGCAACAGCGCAAGCAAGCTCGGAGCTTGCATAGCTGAGGTT  
GAAGAGATGGAACAAGGAATAGTGAAGTGTGAGTGTGAGCTAAGCGCAACTTGAAGTGGTAAAGCGGATCAACAAGGATTAAGAGTGTCTTCTGCTCAAGGAGGAACTAGAACTGCTAAGGAATATGATGCTCTGGTCAAGATAAAGATGTTGGCTTAAAGAAAGTAAAGAAAGCAATGTTGGCG  
TCAAAGAAGTTGAGAAGCAAGTGAAGAATCACCATAGAGTTGATAGCTACAAAGGAGTCAATGGAATCAGCACATGCTTCTCATTTAGAGCGGAAGAACAGAGGATTTGGAGCAGCTATGGCTAGAGCAGGATCTCACCCTTGGGAGAGGAACTGAAGCAAGCGGAGAGGAACTCAAAGACTTAACCAACAG  
ATACATTTCCGAAAGATCTAAAATCGAAGCTCGACACTGCCTCAGCGCTGCTTCTTGAATTTGAAGCGGAATTTGAGTCTTATAGGAATCCAAGCTAAAACAAGAGGCTGTGACTCAACCAACAACCGATCCTTCGACAGAAAATGAGCCATCCAGATTTACATGACGCTGTGCTCTGCAAAAGAGAACTT  
GAAGAGGTCATGTCATAATTTGAGAAGCAGCTGCTGAAGTGAATGCTTGAATTTGGCTCCTCTCTTGCCTTCACTCAAAACAGAGAGAAAGGAAAGTCTACTCTTGGCTTATCAAAACAGAGAGAAAGGAAAGTGGCCCTATAGCAGTAGCTTCTATAGAGGCTGAAATTTACAGAACAGAGTGGAAATAGCTTCGGTTCAG  
TCAAAGGAGAAAGCAGCAGAGAGAAATGTTGAGCTACCGAAGCAACTTCAGCAAGCAGCAGAAAGGCTGATGAAGCAAAAGTCACTTGTGAGTGTCTCGGAGAGCTACGAAAGCGGAAAGAAAGCAGAGCAAGCAAAAGCTGGAAGCAAGTCAATGGAGAGCAGGCTATTTGCTGCGCAGAAAGAAATCGAA  
GCAGCTAAAGCTTCAGAGAGGCTGGCTTAGCTGCCATCAAGCTTTGGAGGAGATGAATCAACATTTAAAGCTAATGACACCGATTTCCACGAGGCTTACACTTTCGCTAGAGAGTACTATGAGCTCAGCAACCTGCTCAGAGGCAAGAACTCGCGAACCGAAGAGTACCGAACCGAAGAGTAGCAGCAGCGGTTCAAGAAATCGAG  
GAAGCTAAAGAAACAGAAATGAGAAGCTTGGAGAATTTGGAAGAAATTAACAGAGACATGGATGCGGAGAAAGAGCAATTAAGAAGCAACTGAAAGGCTGAGAAGGCTAAAGAGGGAAGTGGGGTGGAGCAGGAGCTGAGGAAATGGAGGCGAAGCAATGAACAAAAGAGAAAGGCTGGTGTGGATGAGTCAACACT  
GAGAAAACCTAAAAGAAAGCTTTGAAGGAGGAAAGATGGAGCAATCACTGAAGCTGTTGTTTATGCTCCAGCCAAAGTGTGATATGGAACAGAAAGAACTGAAACCAATCTATCCCAACAGCAAGGCTCGAAAGAAAAGAAAGGCTTCTTTCCCGGGTTTTTATGTTCTTGTCAAAAGAAAGTCA  
CATAAATTTGA

Sequences with ambiguous or non-significant matches in the databases:

|                   |      |                                                                                |
|-------------------|------|--------------------------------------------------------------------------------|
| >42_23_4s         | 1-59 | TCGTAAGGTACCTGAAACTGAAGGCACCATCAATGTCGTAGGCACCATCCCCCTCATAA                    |
| >42_23_2s         | 1-54 | -CGTAAGGTACCTGAAACTGAAGGCACCATCAATGTCGTAGGCACCATCCCCCTC----                    |
| >II_85_31_F9_1s   | 1-77 | CCTGTTTAAACAAAAATCAGTTTCATGATTTATCAGCCATAGCCTGATATTTTGCTTTTAAACGGCTAAATACATCCT |
| >42up6_2s         | 1-67 | TTACCCCTGTAACTGGTGCAGCCCAATTCGAGCCCCACGTGGCCCTCTTGTGGGCACCTCAATA               |
| >II_85_3_II_3s    | 1-65 | TGGGGCATTAAATGTGACGGAATGGGAAGSCCAACCCGGTTGCCTTCACCGAACCATCATTTTT               |
| >II_42_67_C9_3s   | 1-51 | GATTGTAAGGAAGTGTAGGCACCATCAATATCGTAAGGGCCCCATAACGTA                            |
| >42_9_1s          | 1-47 | AGCACCTGAAGGCACCTGAAAAGCACCTGAAGGCACCTGAAAAGCAC                                |
| >85_11_1s         | 1-47 | GTGAATTGCTATGATTGGTTAATTTGCTTGTGGTTATGTTGCTATC                                 |
| >42_13_2s         | 1-46 | AAGCAATGATGATGTTAAGCACTTGGACGTCGTCCAAGTGCCTAAC                                 |
| >42_21_2s         | 1-45 | CCTGAAACTGAAACCTGAAAGGCACCTGAAACCTGAAACTGAAAC                                  |
| >42up6_3s         | 1-43 | ATGAAAAATTGGGGCCCCATTAATTTTCGTAGGGACCTGAAAT                                    |
| >42_36_2s         | 1-41 | TACAGTGTGATGTTAATGTGAATCCCAGCAGGTTCCGATCG                                      |
| >42_24_2s         | 1-40 | CTGTATGCACCATTTTTGTCGTGGCACCATCAATATTTAA                                       |
| >42_36_1s         | 1-39 | TATCCCTGCCTGGGATGGCCGCACAGCGGTCGTGACAGAC                                       |
| >42_10_1s         | 1-39 | TGGGGCCGGTGTGCTGGGCGTGTGCTGCCGCTGTTTGA                                         |
| >II_42_49_B11_1s  | 1-38 | CCGTTGGGCCCCACAAAAACTGTGGGGCCCATCAAAAC                                         |
| >42_12_1s         | 1-37 | TGTTCCAGCAATGACGACTGCCTGCTGTCGGAGCCTC                                          |
| >I_42_UP_32_H7_1s | 1-36 | TCACCTTGTGGCCAAGGGTTCGTATAAATTCGCTTCC                                          |
| >II_42_75_D1_1s   | 1-33 | TCAGAGTTGCGCAGTTTCAGCCTGGTGGCCCTC                                              |
| >42_19_2s         | 1-25 | ATCAATTGAAGGAAGGAAAGAGTGC                                                      |
| >42_5_1s          | 1-25 | GAAGTTGTTCCATCGAATCTTTTTG                                                      |
| >II_42_52_C1_4s   | 1-24 | ATACCCCGCTAAAAAAAACA                                                           |
| 42_7_2s           | 1-21 | GGCACCTCAAACGTAAGGCAC                                                          |

Transcript corresponding to Homo sapiens genomic DNA (AC027319)

|                |      |                                                                                 |
|----------------|------|---------------------------------------------------------------------------------|
| >II_85_3_II_2s | 1-79 | TTCATTTGAGCCATGCAGGGCCTTGCAAGGCAAAGCCAGGCCTTTGGATTTTACTTCAAATGCTGTAGGCACATCAATA |
|----------------|------|---------------------------------------------------------------------------------|
