# Supplementary material
Source: PubMed Central journal article supplement (PMC2675743)
Supplement: pp.108.134767_3.pdf [file pp.108.134767_3.pdf]

# Suppl. material S4, Zhang et al. (2009)

## Effect of PS RNA on the Translation of BMV RNA

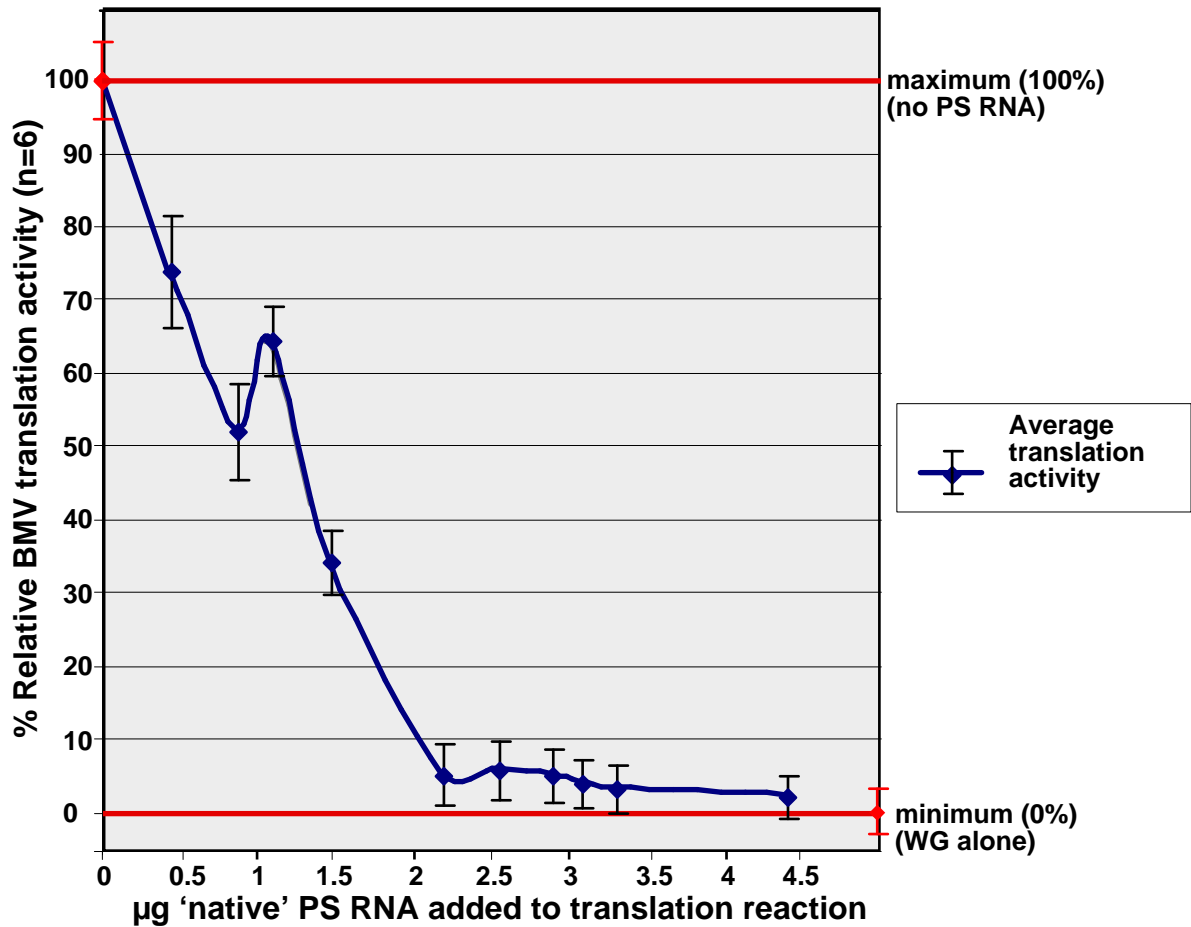

Increasing amounts of native PS RNA were added to the WG translation system, and the translation activity was measured relative to BMV RNA translation activity without PS RNA (100%) and without BMV RNA template (0%). According to the assays (n=6) native PS RNA inhibition efficiency is positively correlated with its concentration in translation system. Note that the reaction curve indicates a complex reaction with at least two inhibitory components present in the PS RNA sample. Error bars indicate standard deviation of the means.

## Proteins potentially present in the PS RNA samples do not alter translation

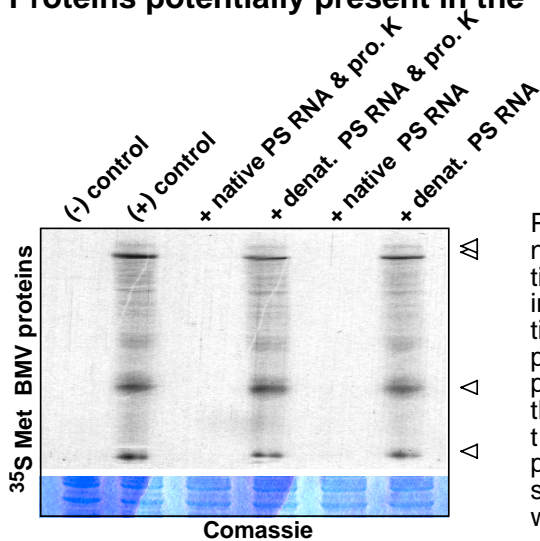

Protein contamination in native PS RNA samples is not responsible for the inhibitory effect on translation. Protease K treated 'native' PS RNA effectively inhibits translation. To ensure that after PCI extraction no proteinaceous components from the PS are present the PS RNA sample were treated with protease K (5µg) for 1 h. After protease inactivation the treated RNA samples were added to the WG translation. Arrowheads indicate the CMV RNA produced proteins. (-) negative control (translation system without template); (+) positive control (WG with BMV RNA only).
